# Supplementary material for: Rapid assembly of quinazolinone scaffold via copper-catalyzed tandem reaction of 2-bromobenzamides with aldehydes and aqueous ammonia: application to the synthesis of the alkaloid tryptanthrin
Source: Royal Society of Chemistry journal article supplement (doi:10.1039/c4ra10799c), 2014-01-01

## Supporting Information for

### **Rapid assembly of quinazolinone scaffold via copper-catalyzed tandem reaction of 2-bromobenzamides with aldehydes and aqueous ammonia: application to the synthesis of alkaloid tryptanthrin**

Shenghai Guo,<sup>\*a</sup> Yan Li,<sup>b</sup> Li Tao,<sup>a</sup> Wenwen Zhang<sup>a</sup> and Xuesen Fan<sup>\*a</sup>

<sup>a</sup> Collaborative Innovation Center of Henan Province for Green Manufacturing of Fine Chemicals, Key Laboratory of Green Chemical Media and Reactions, Ministry of Education, School of Chemistry and Chemical Engineering, Henan Normal University, Xinxiang, Henan 453007, P. R. China. E-mail: [shguo@htu.cn](mailto:shguo@htu.cn); [xuesen.fan@htu.cn](mailto:xuesen.fan@htu.cn)

<sup>b</sup> School of Science, Jiaozuo Teachers' College, Jiaozuo, Henan 450001, P. R. China

## Table of Content

|                                                                               |                |
|-------------------------------------------------------------------------------|----------------|
| <b>I. Copies of <sup>1</sup>H and <sup>13</sup>C NMR spectra of 3a-3w</b>     | <b>P2-P24</b>  |
| <b>II. Copies of <sup>1</sup>H and <sup>13</sup>C NMR spectra of 5a-5l</b>    | <b>P25-P36</b> |
| <b>III. Copies of <sup>1</sup>H and <sup>13</sup>C NMR spectra of 6 and 7</b> | <b>P37-P38</b> |
| <b>IV. Copies of <sup>1</sup>H and <sup>13</sup>C NMR spectra of 9</b>        | <b>P39</b>     |

# I. Copies of $^1\text{H}$ and $^{13}\text{C}$ NMR spectra of 3a-3w

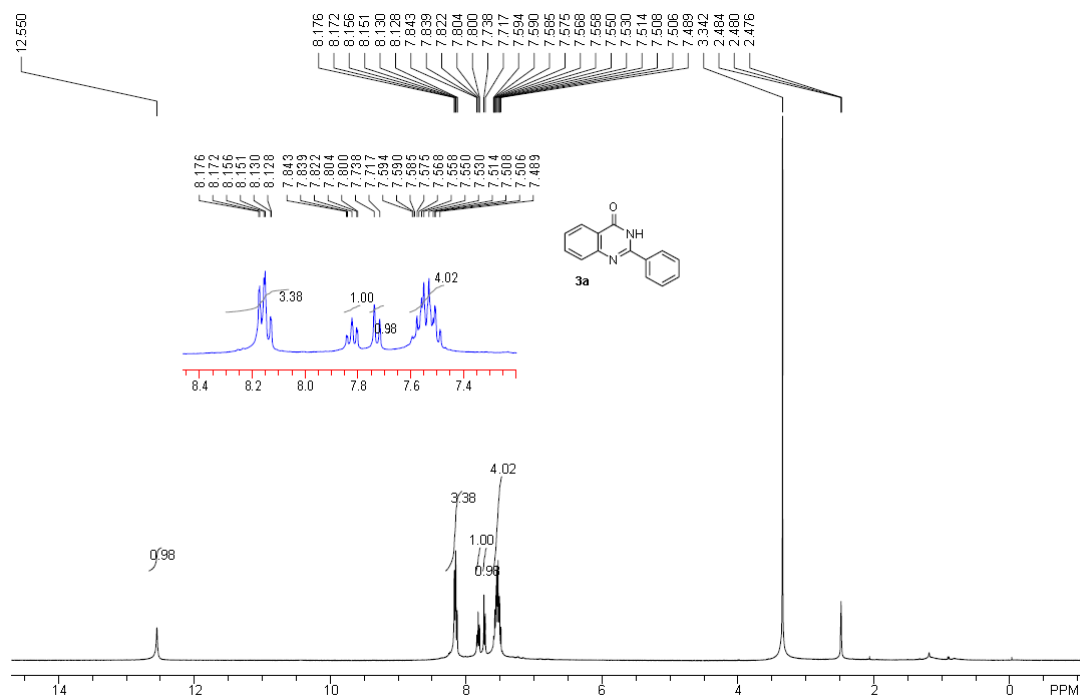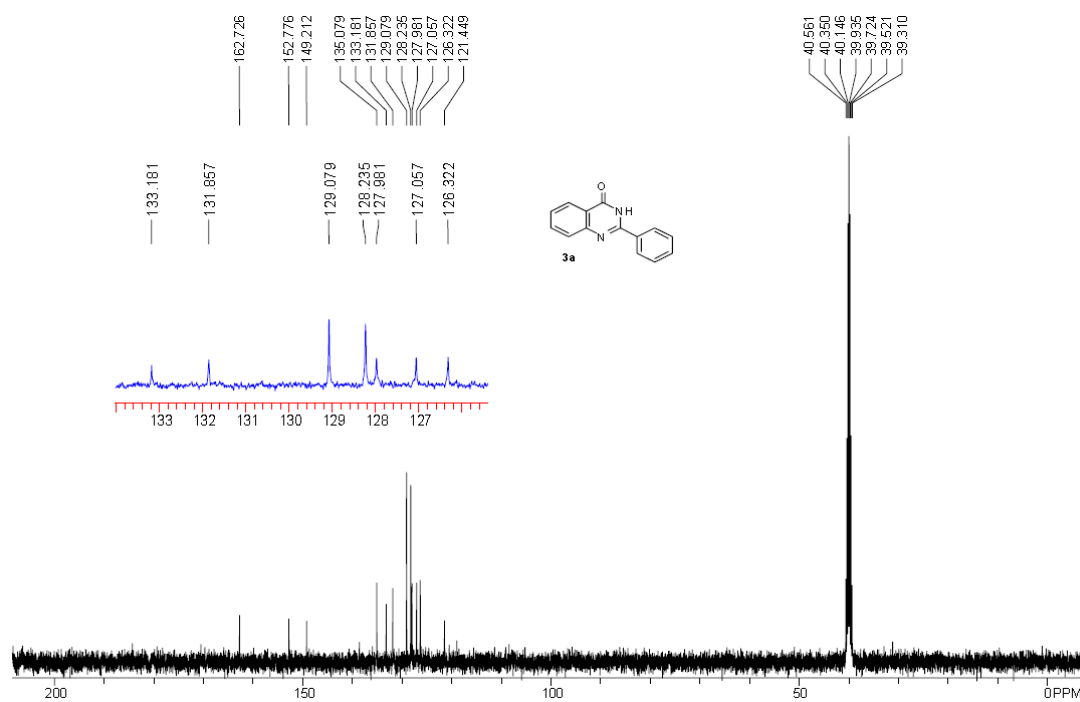

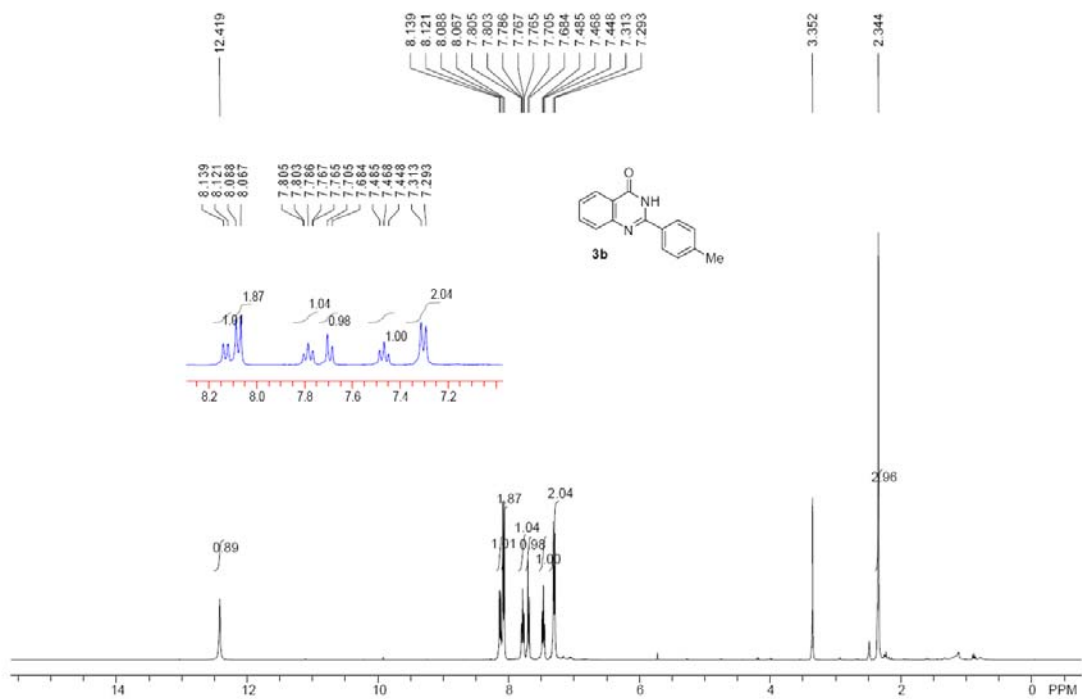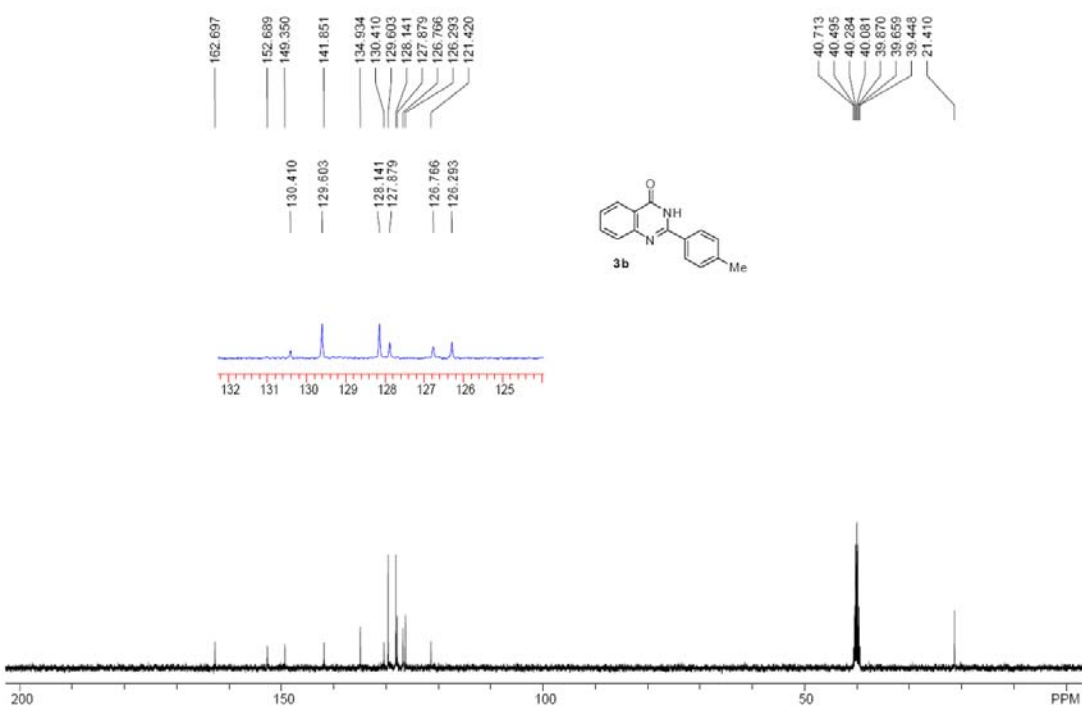

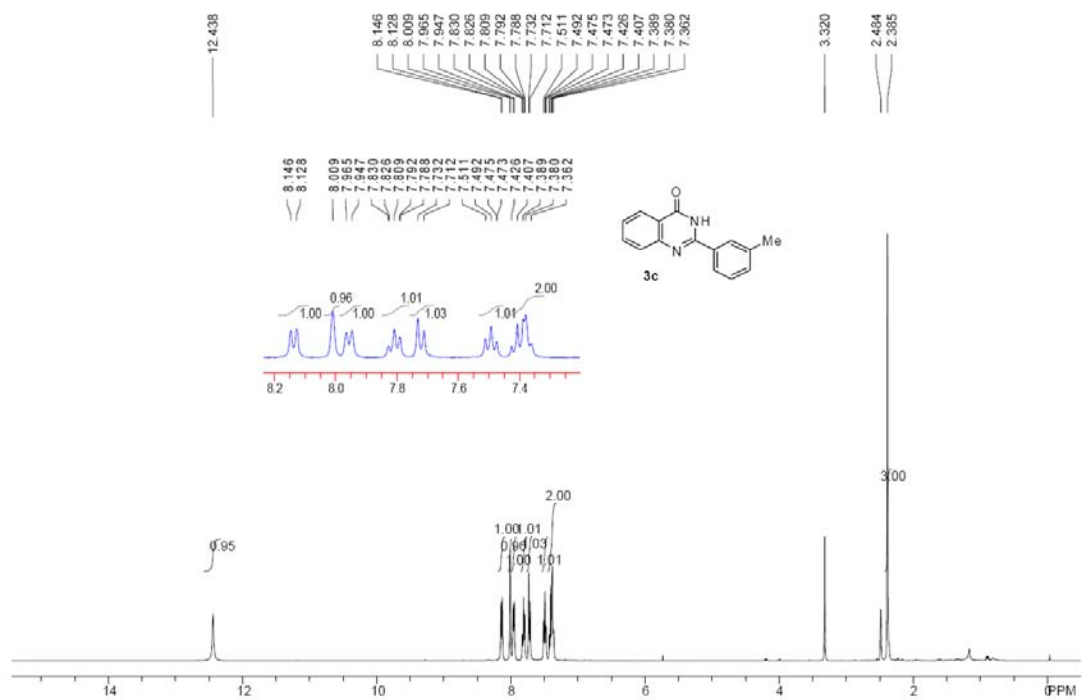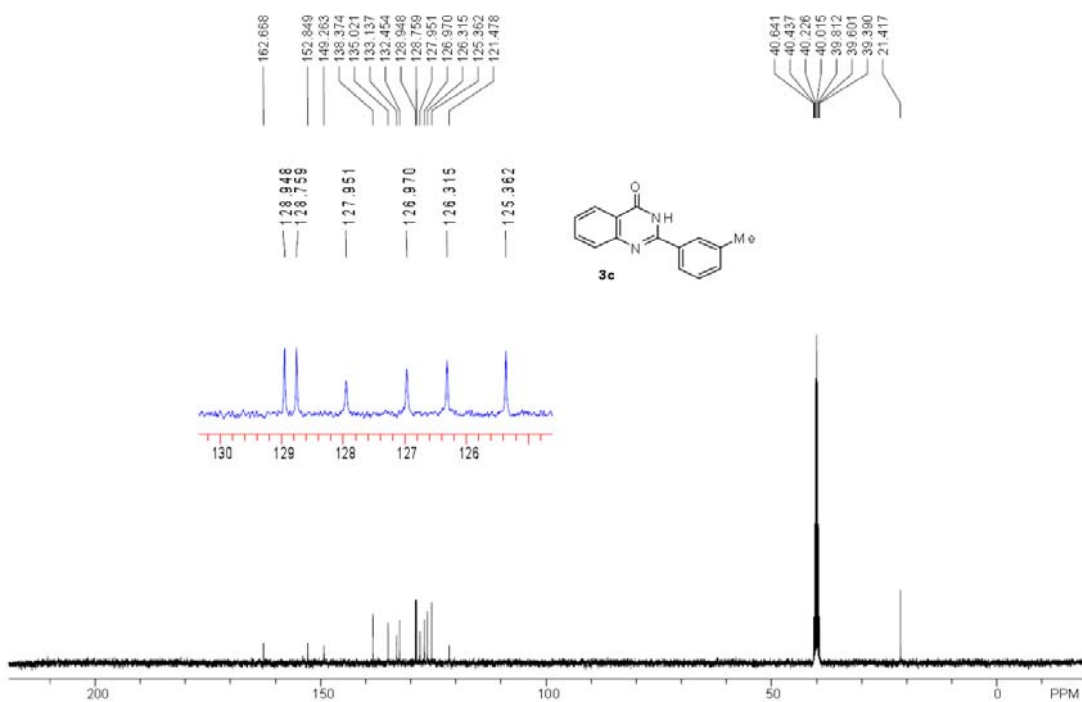

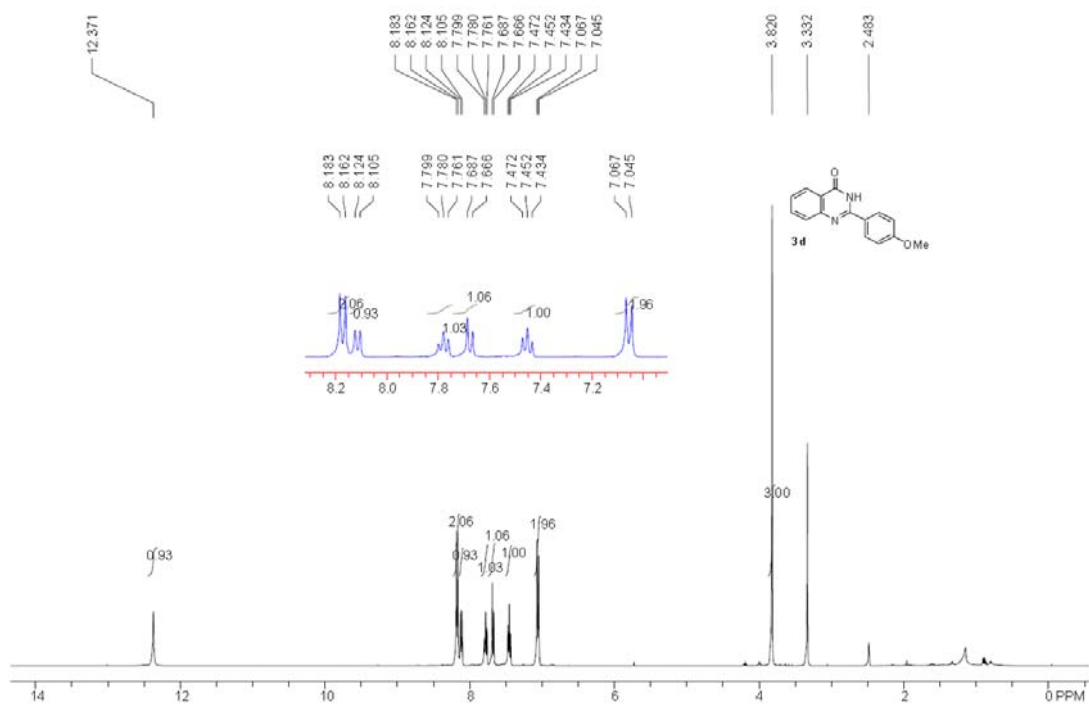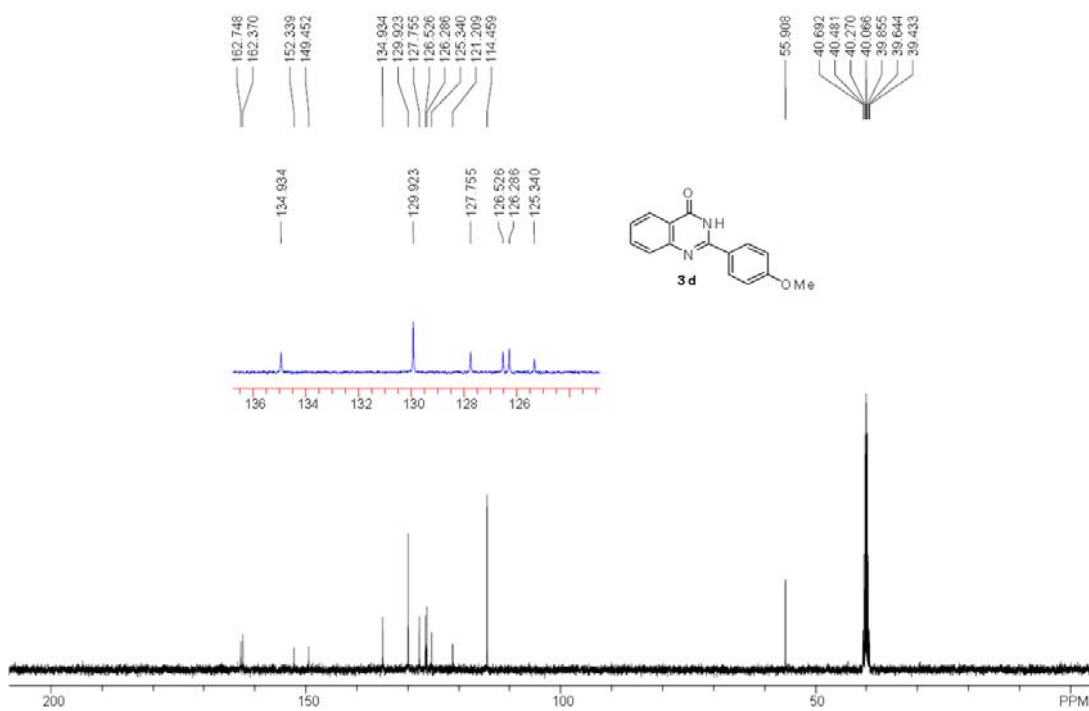

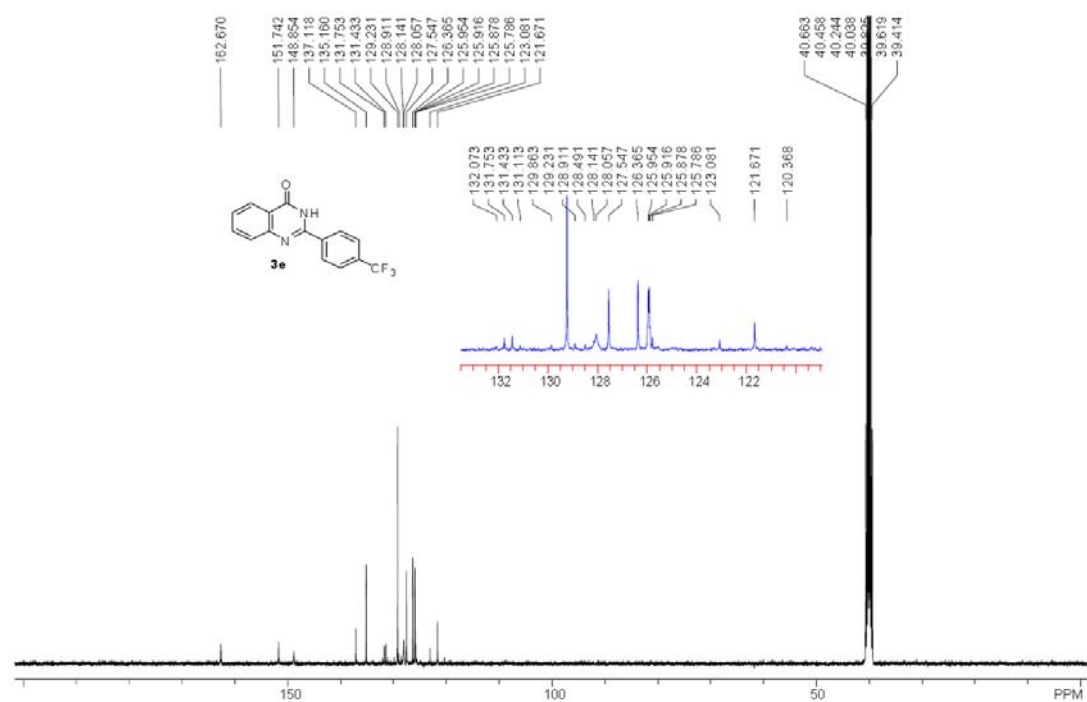

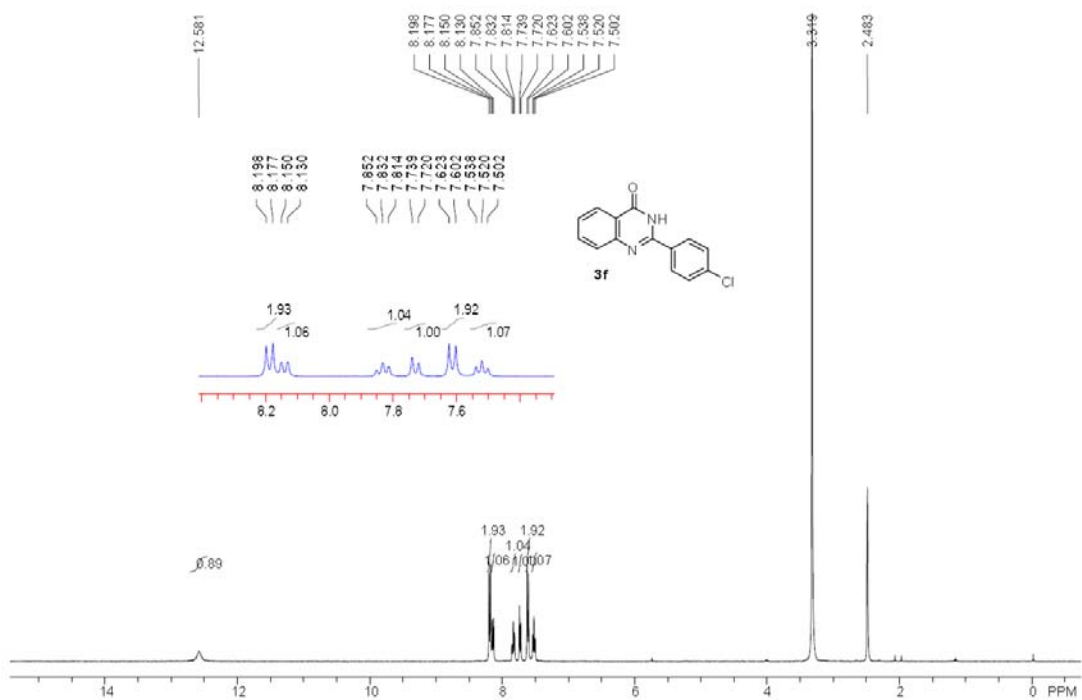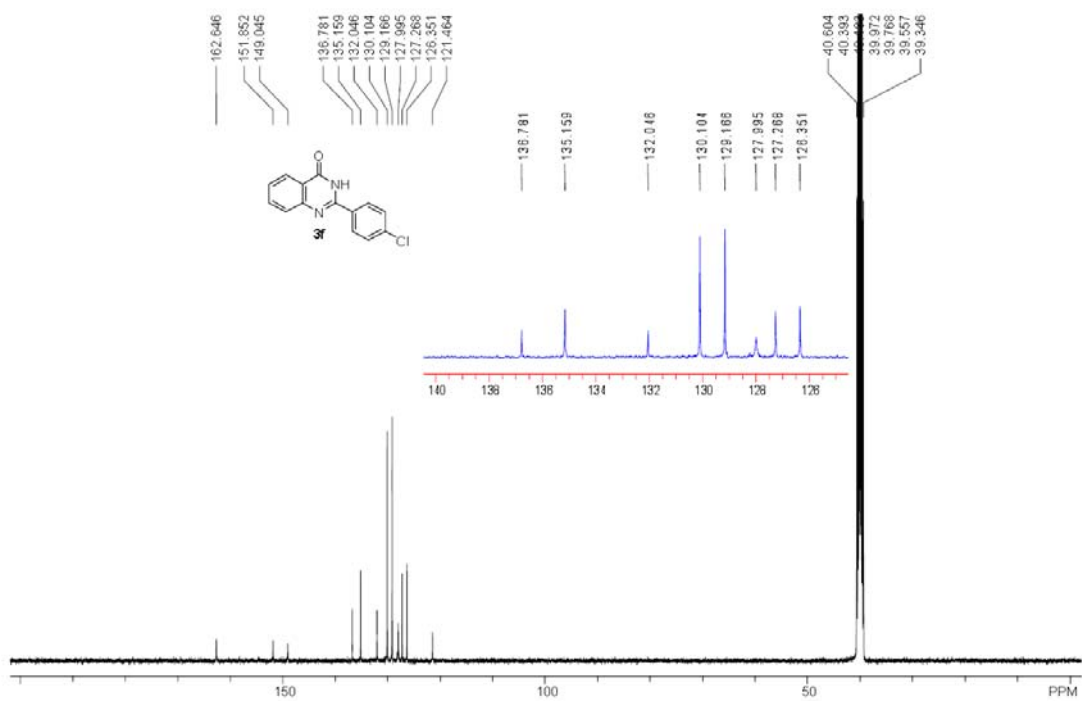

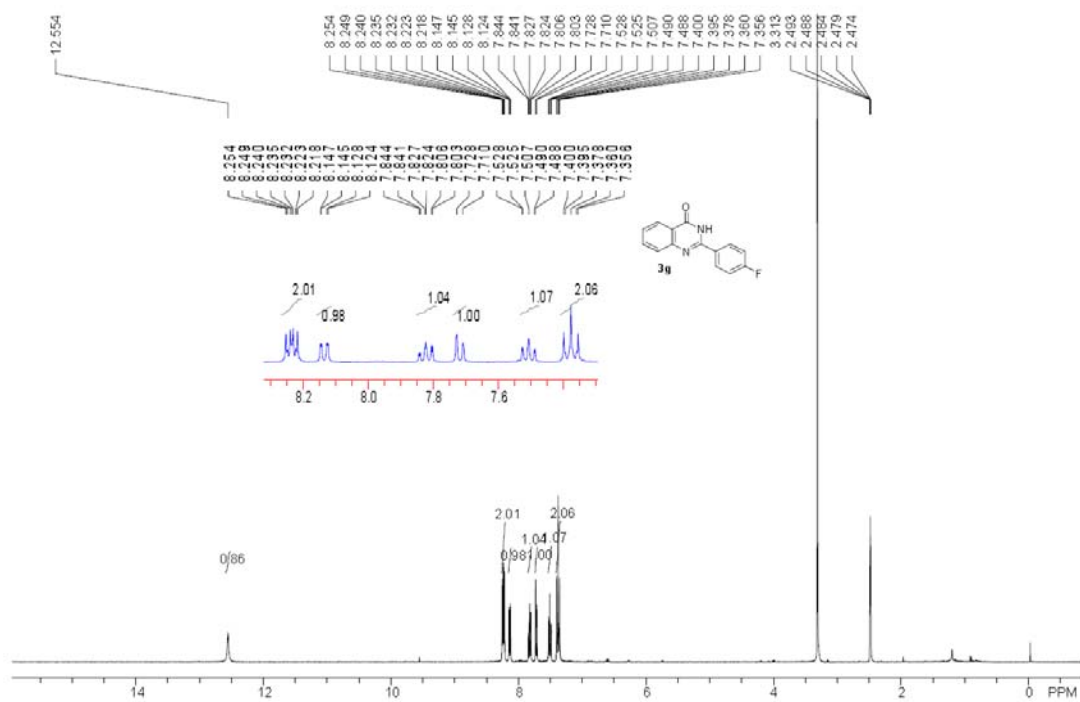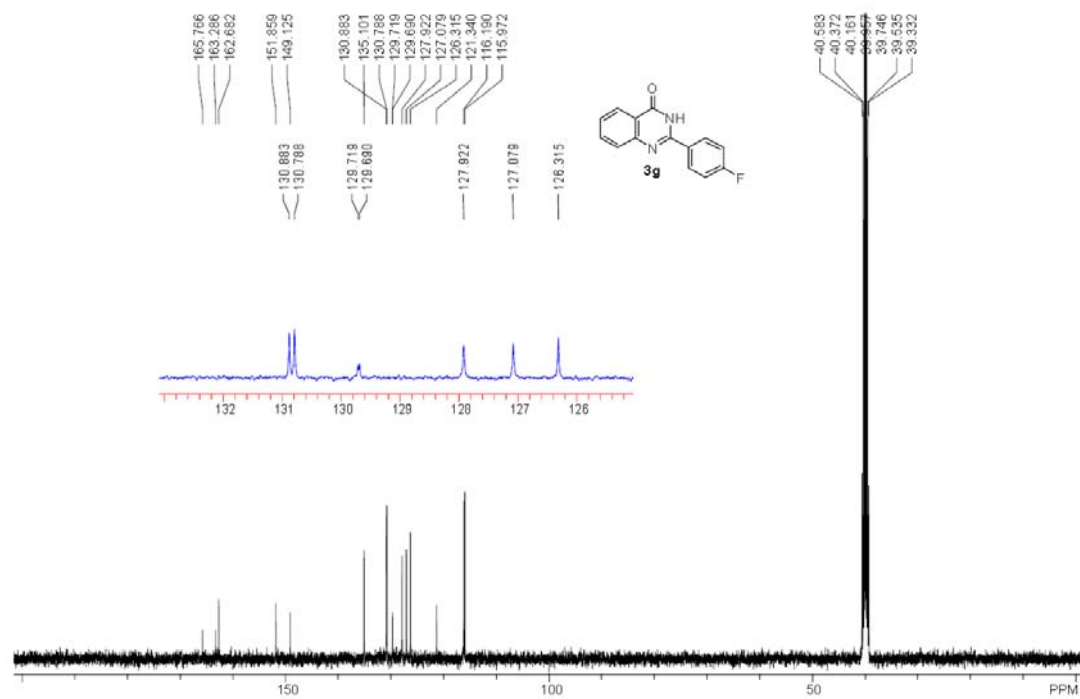



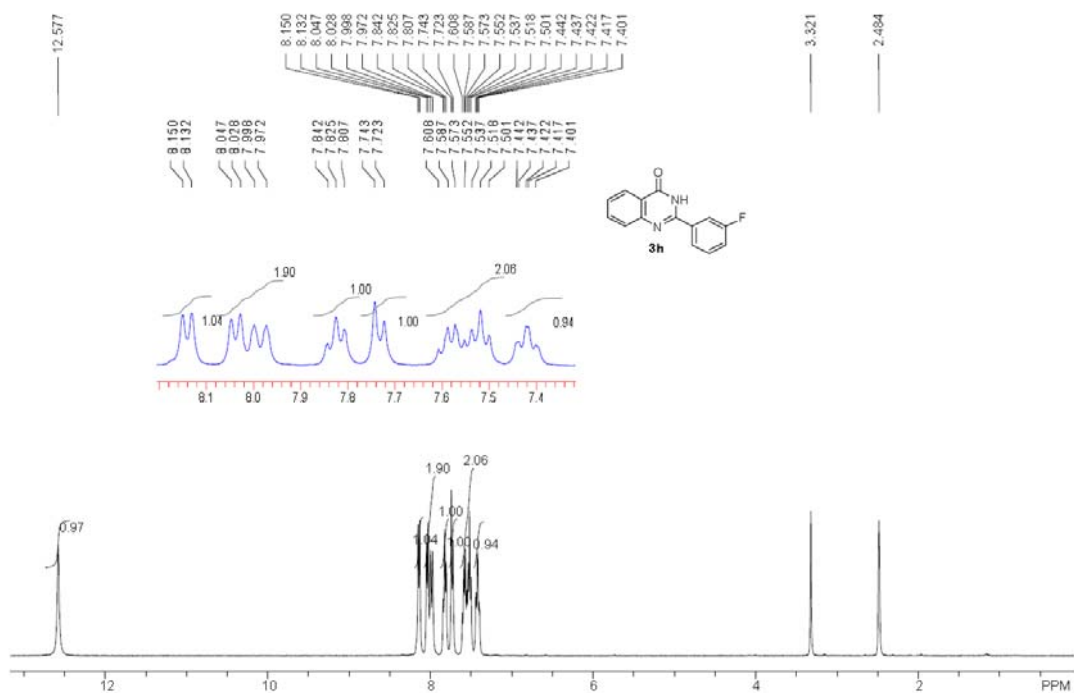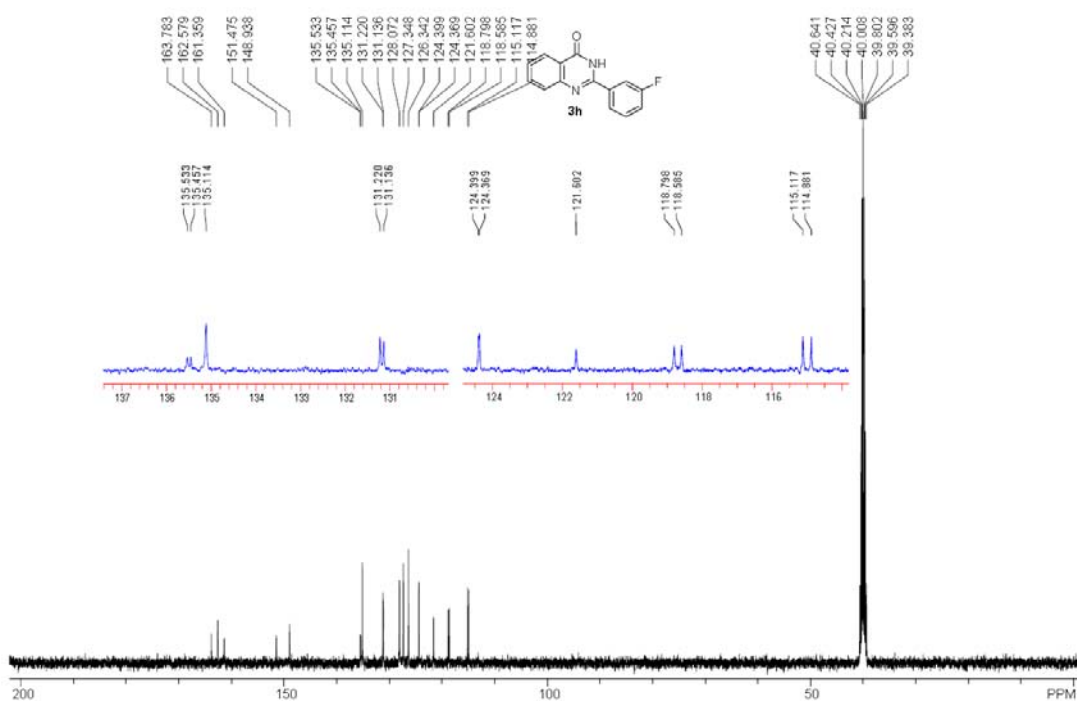

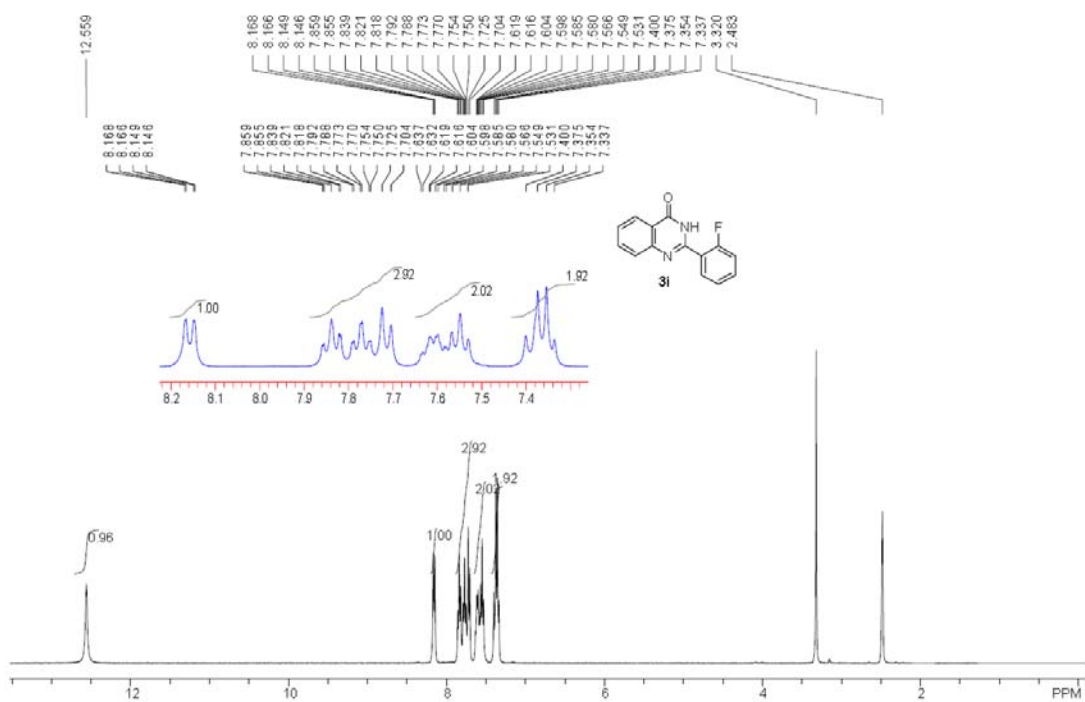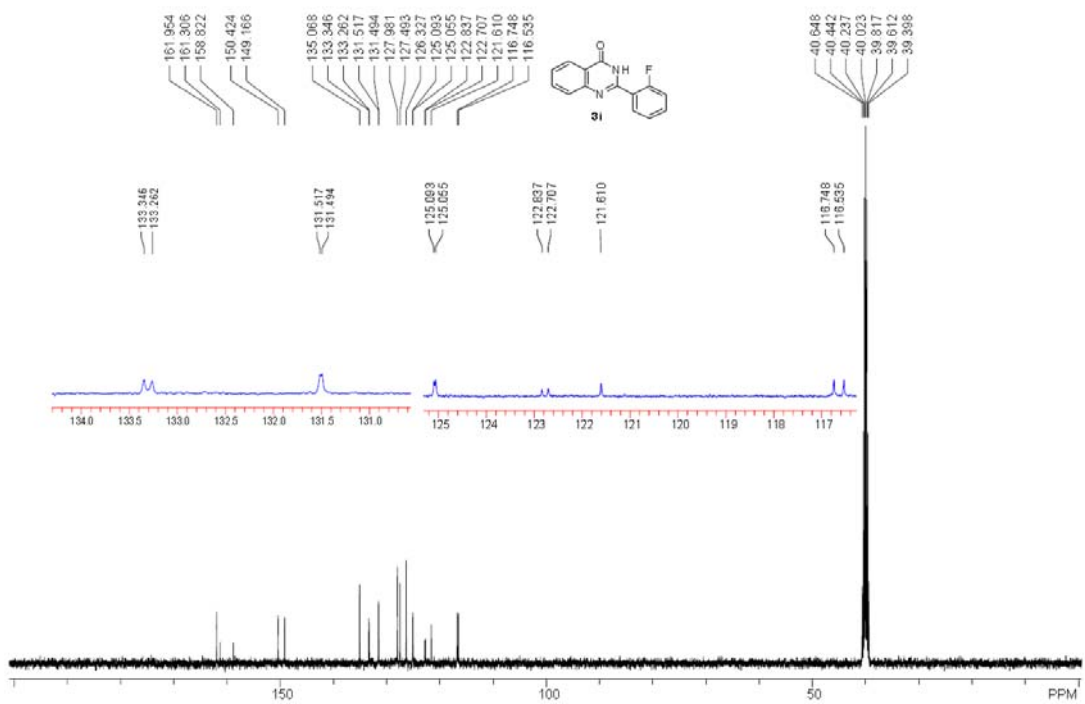

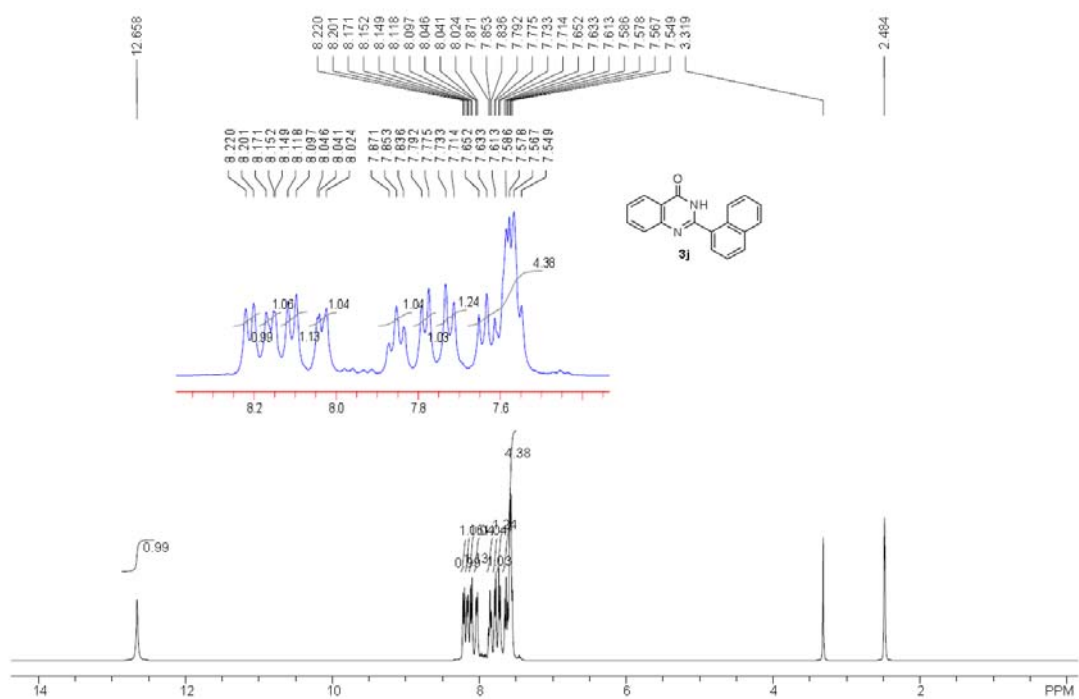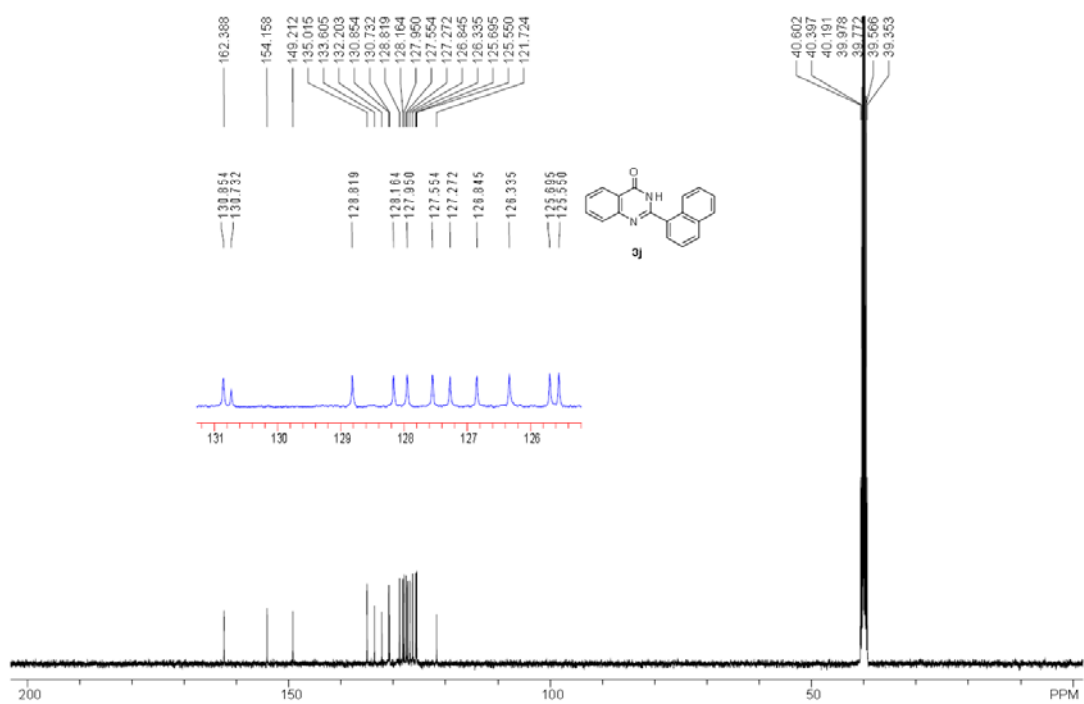

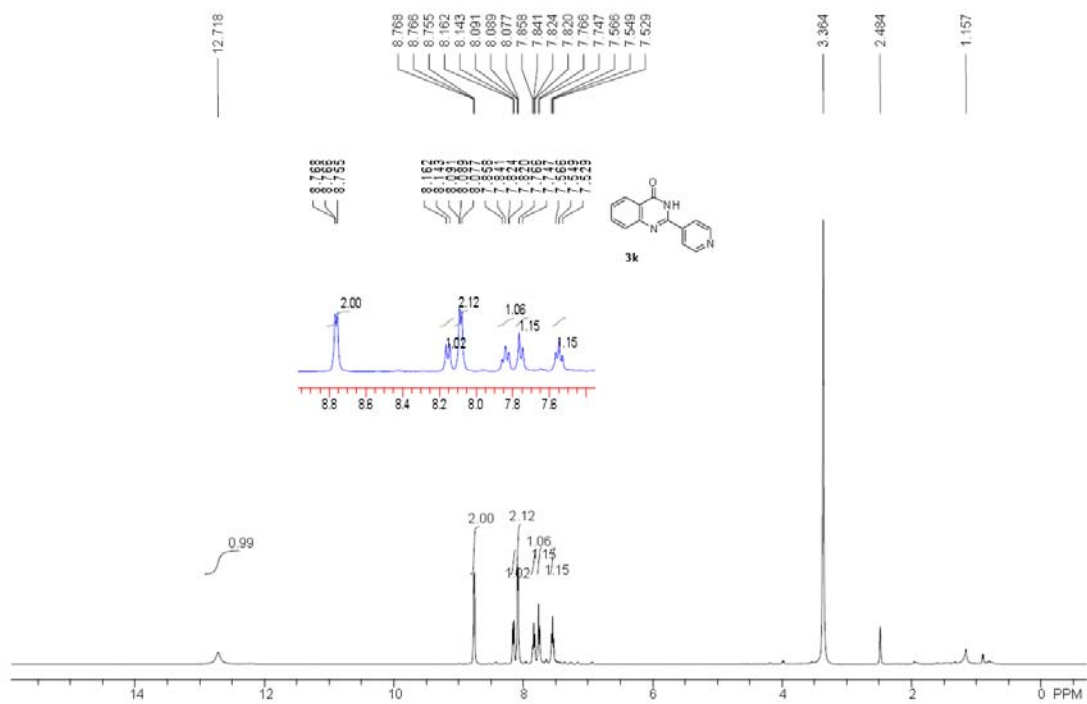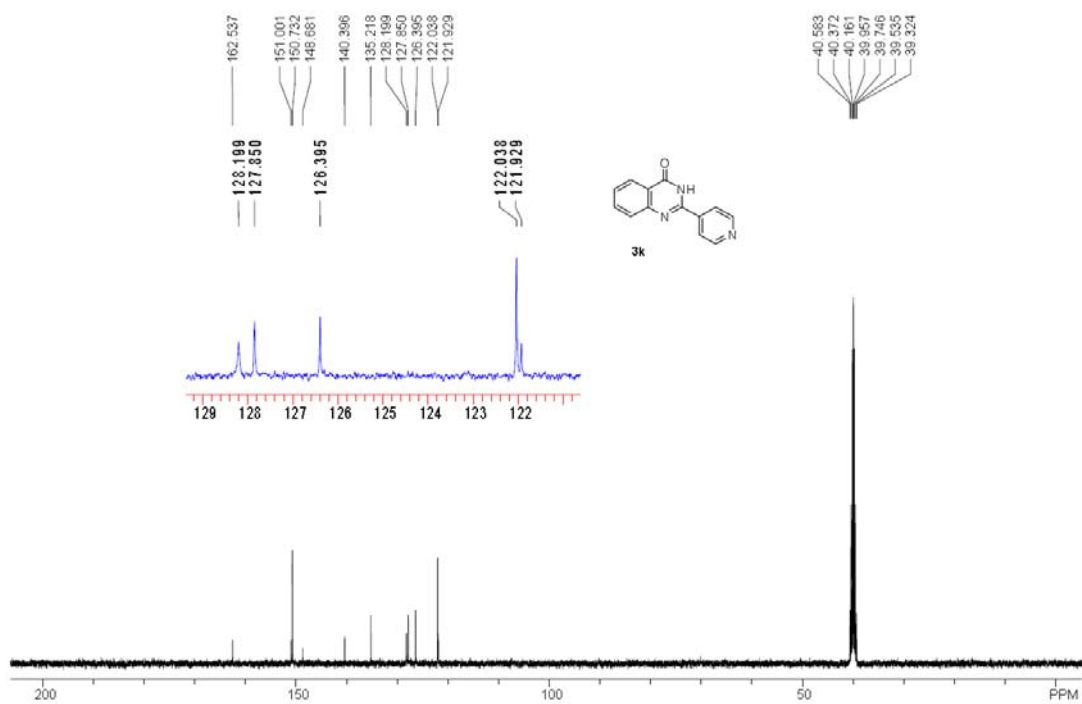

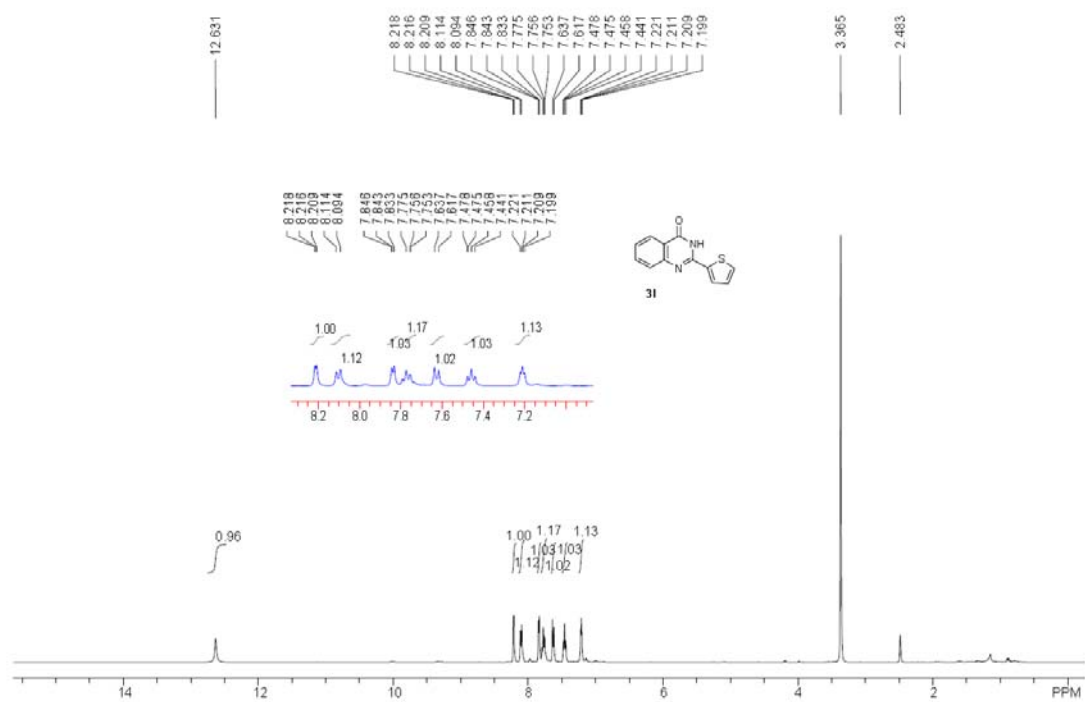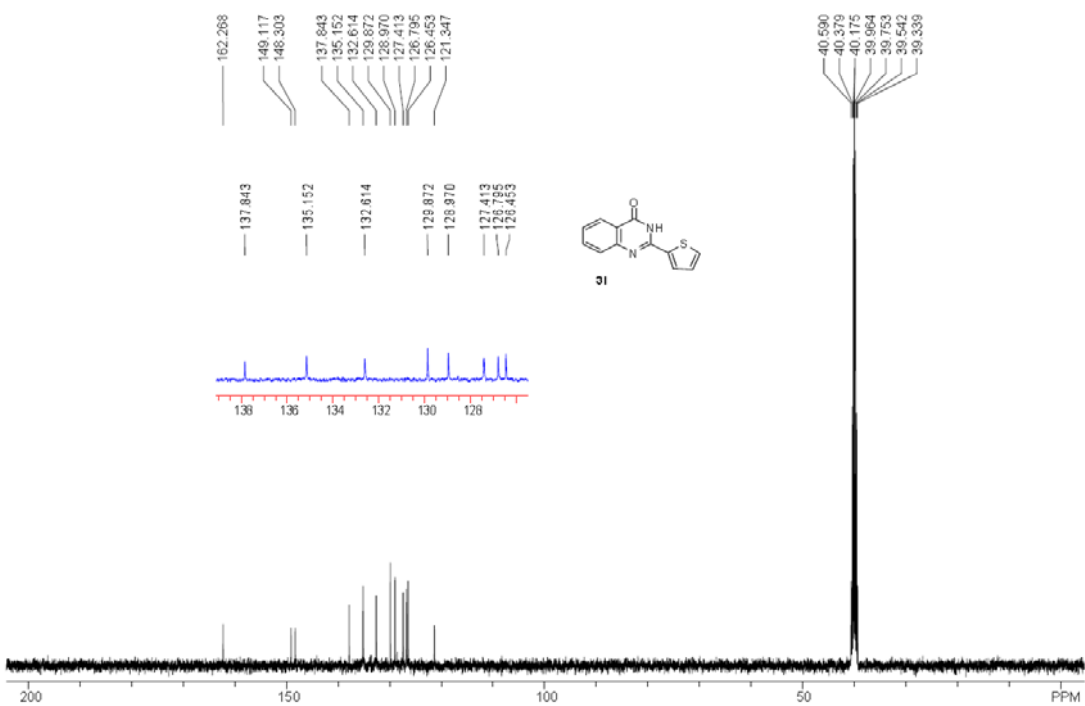

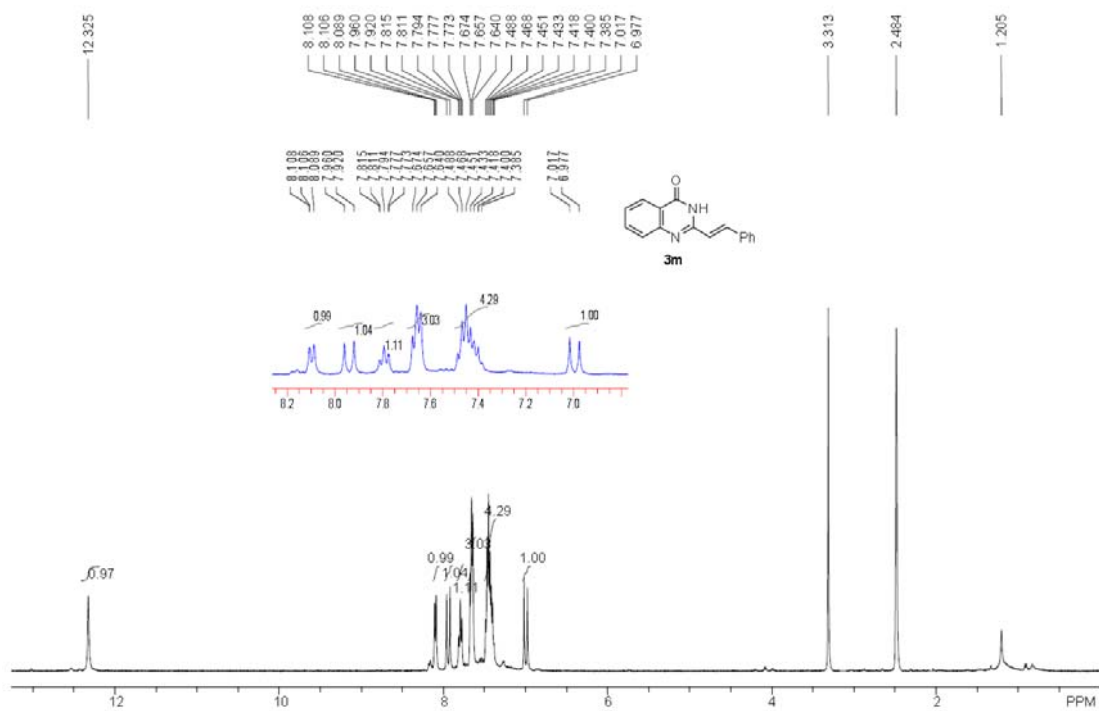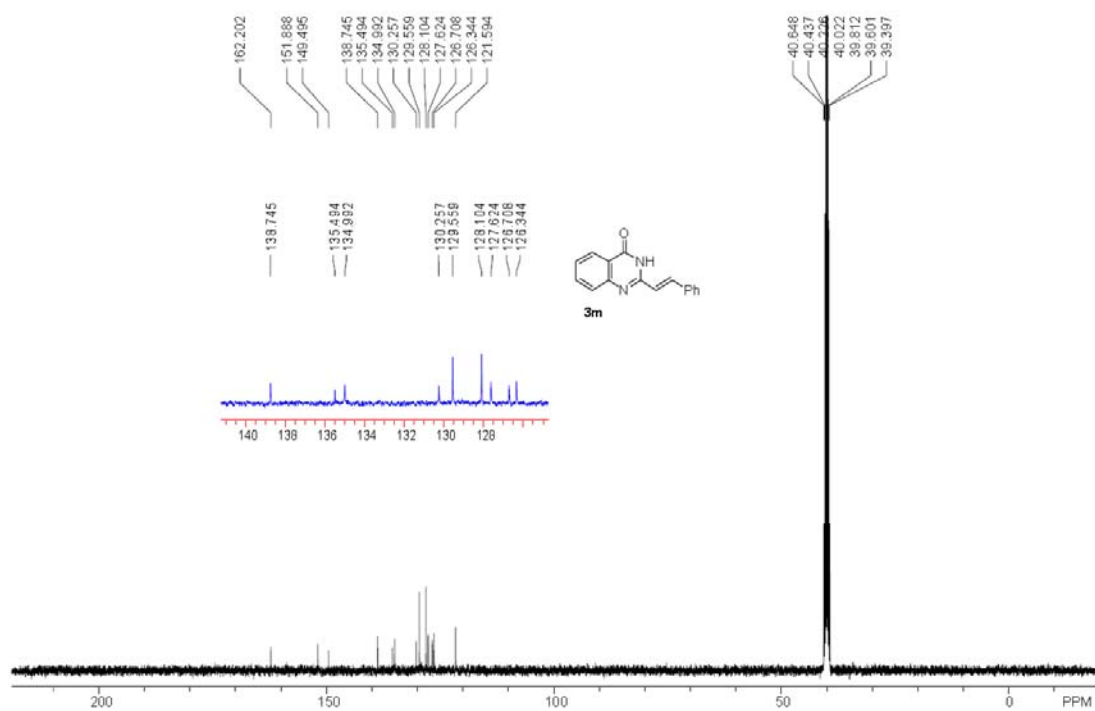

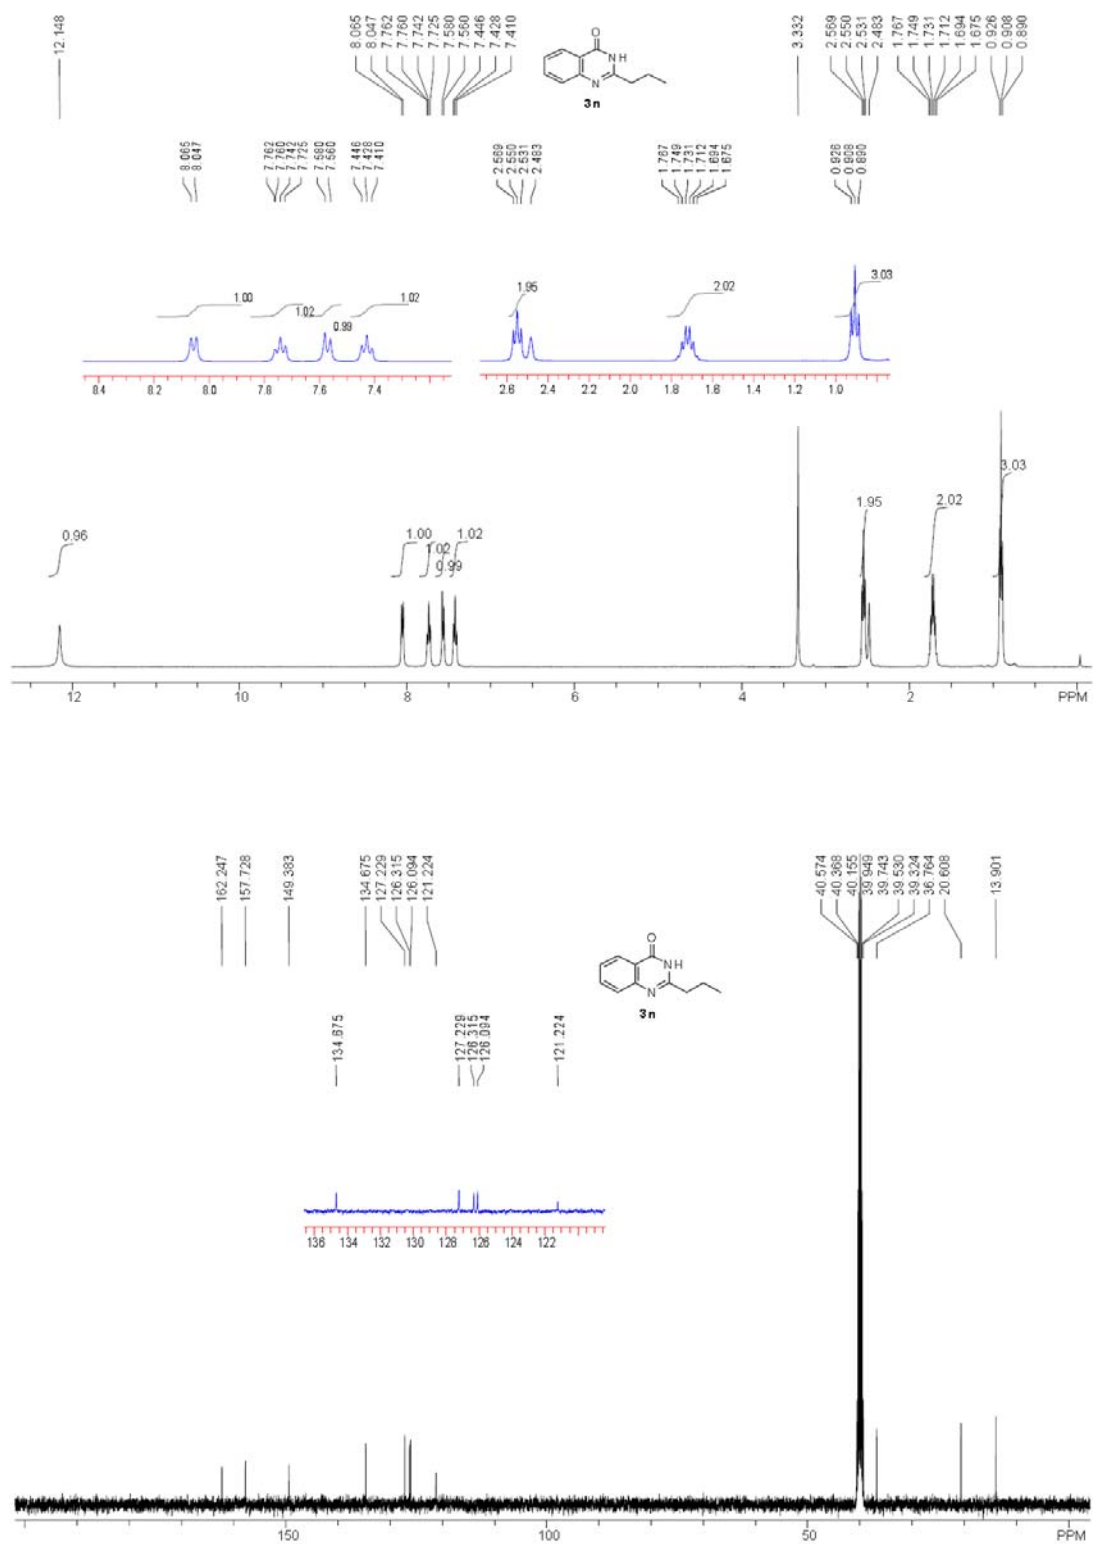

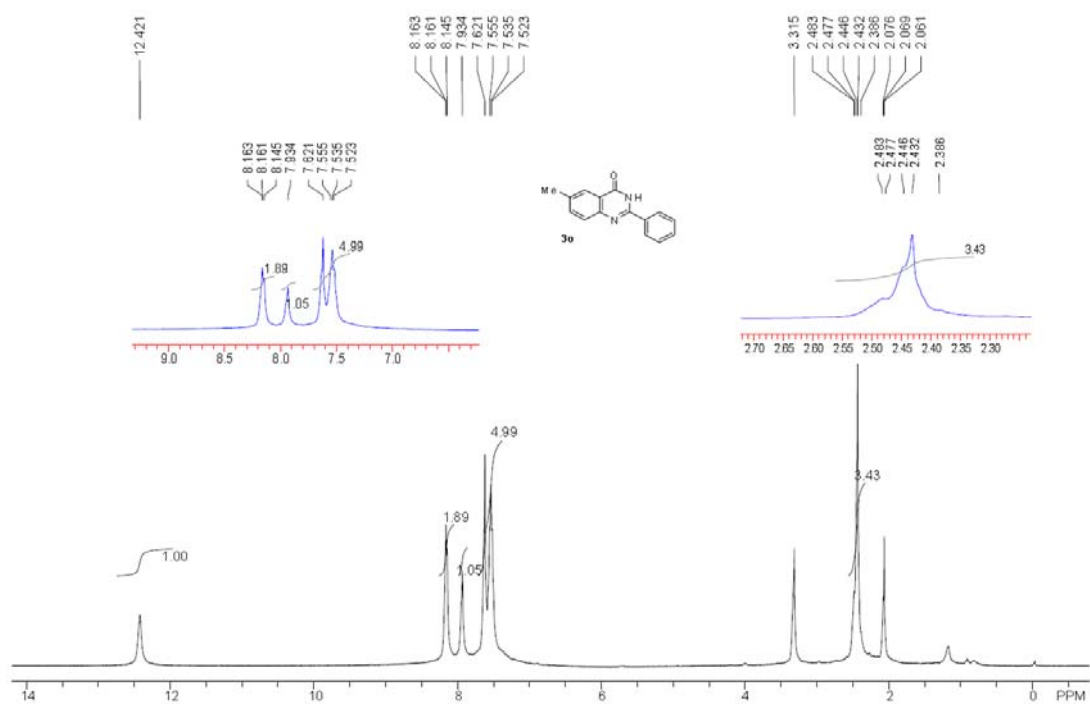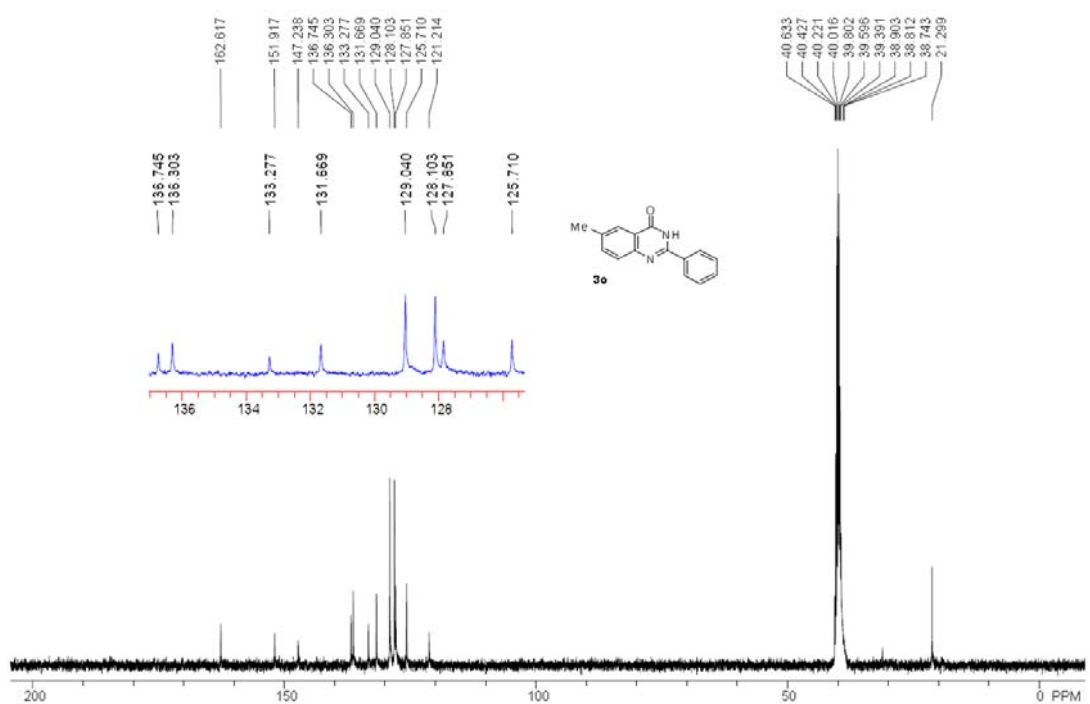



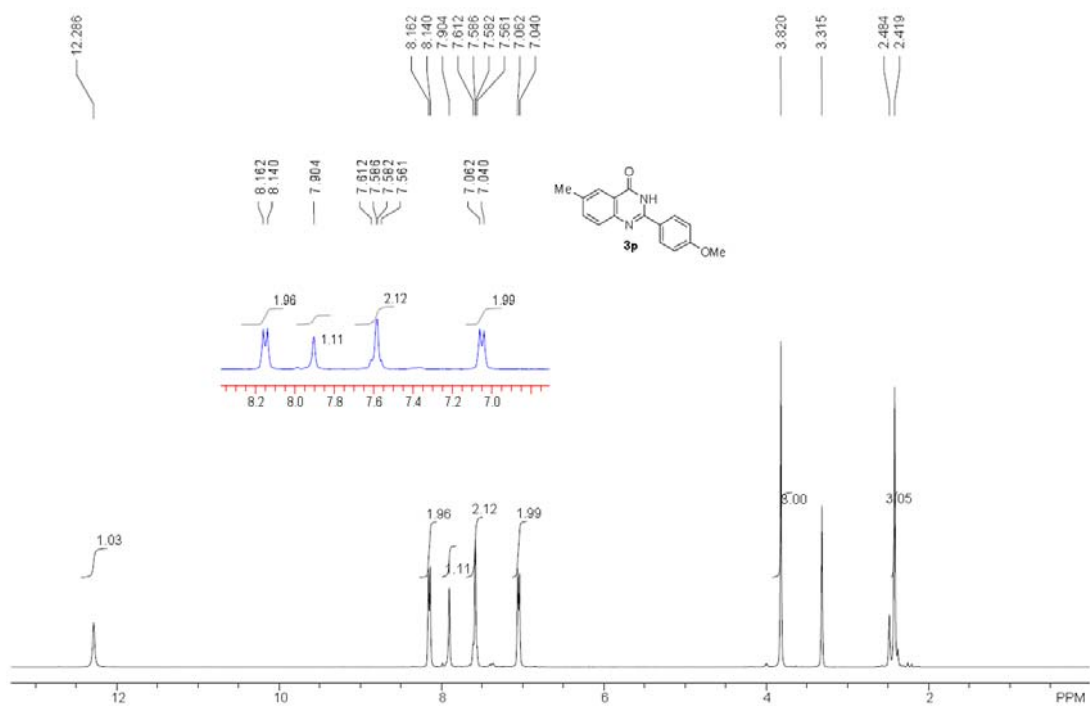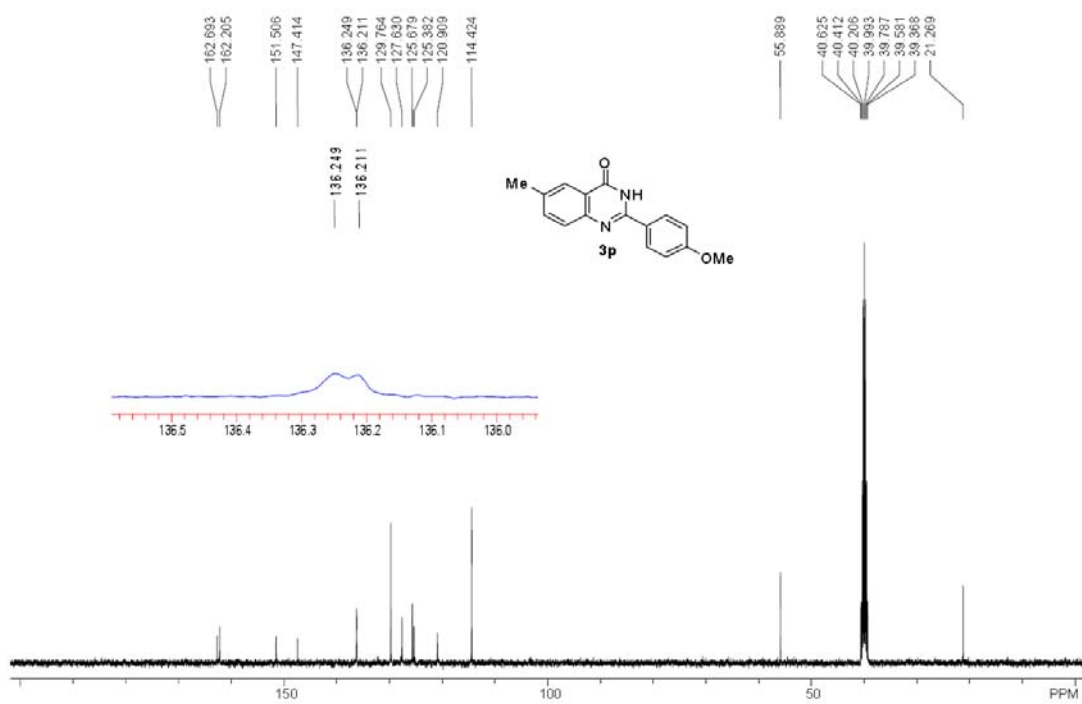

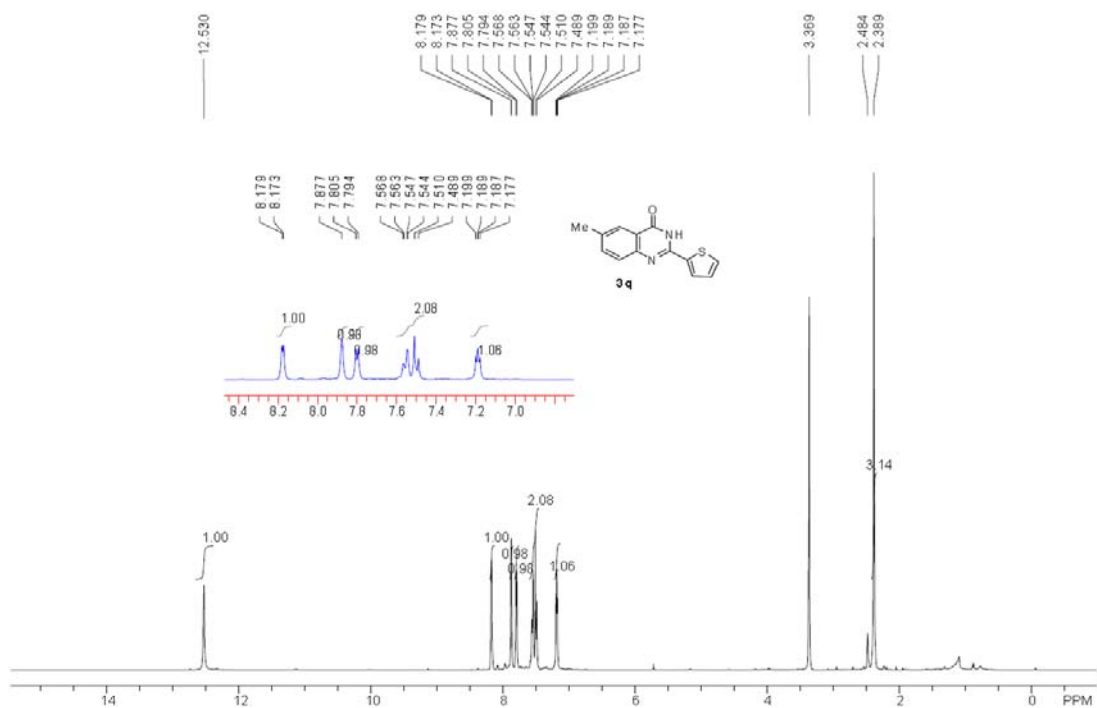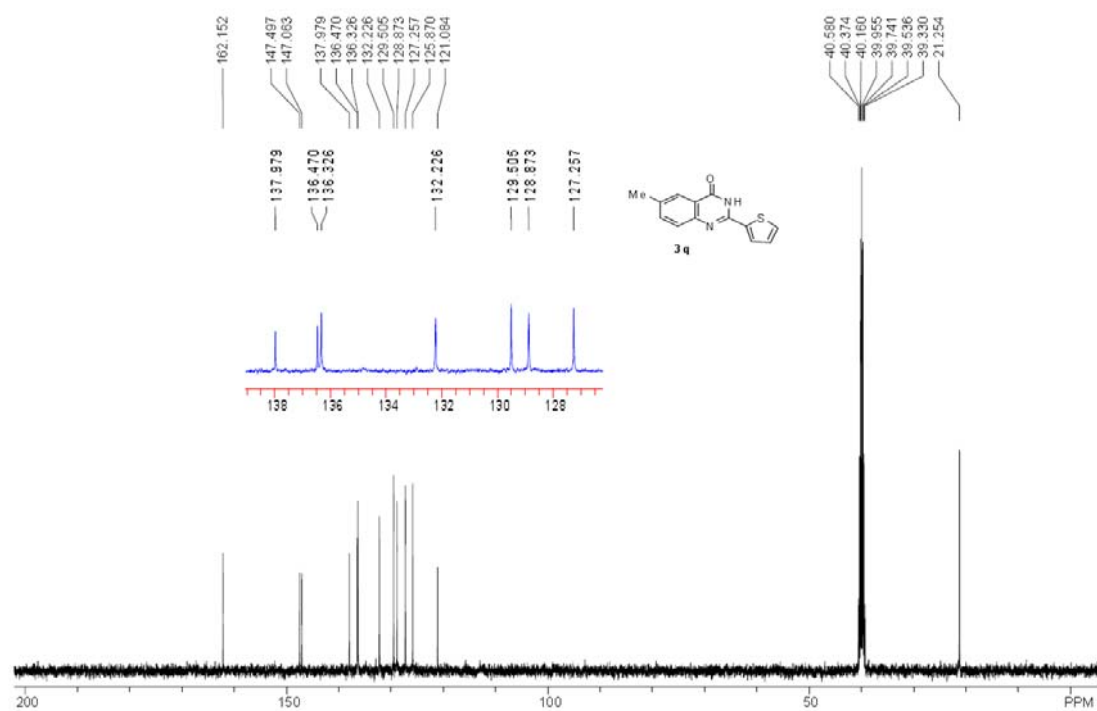

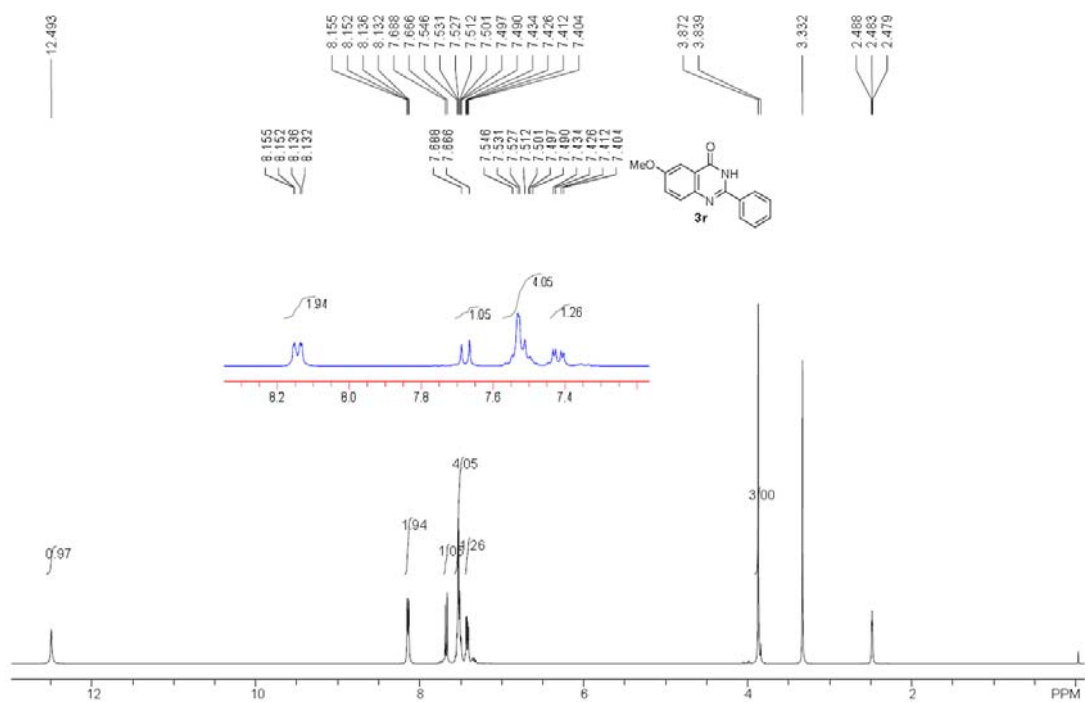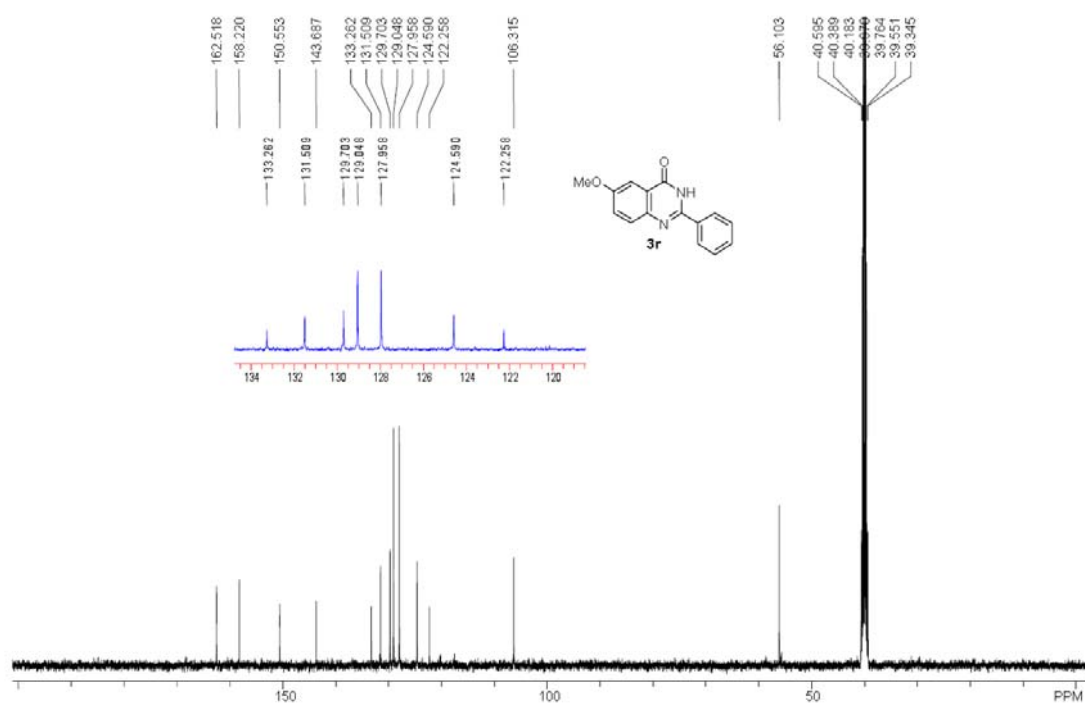



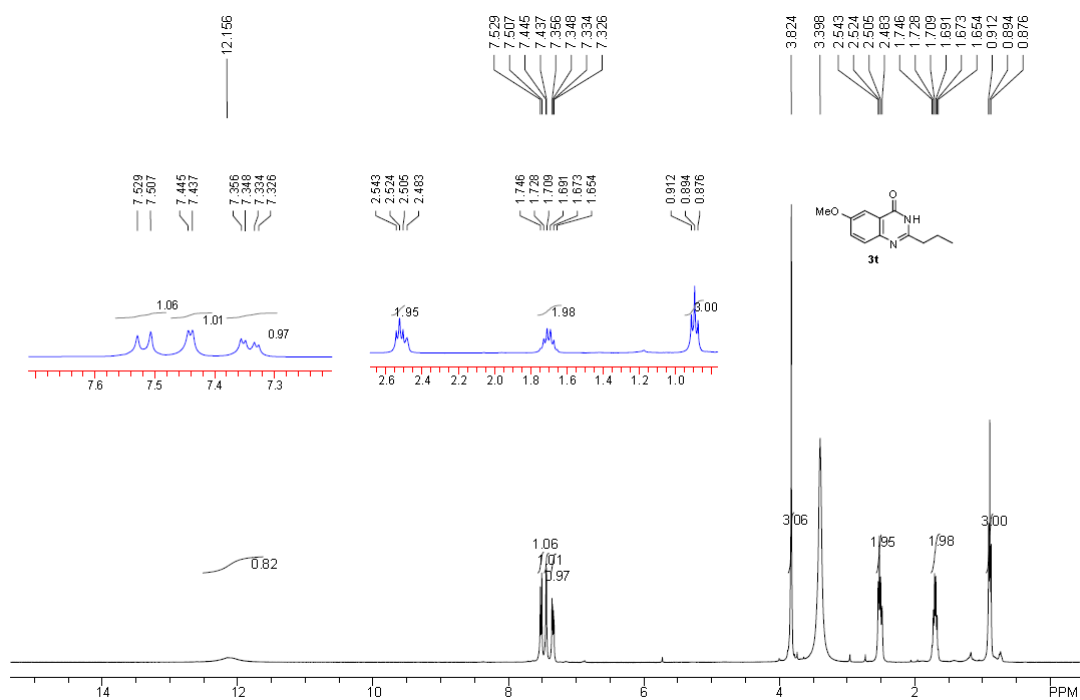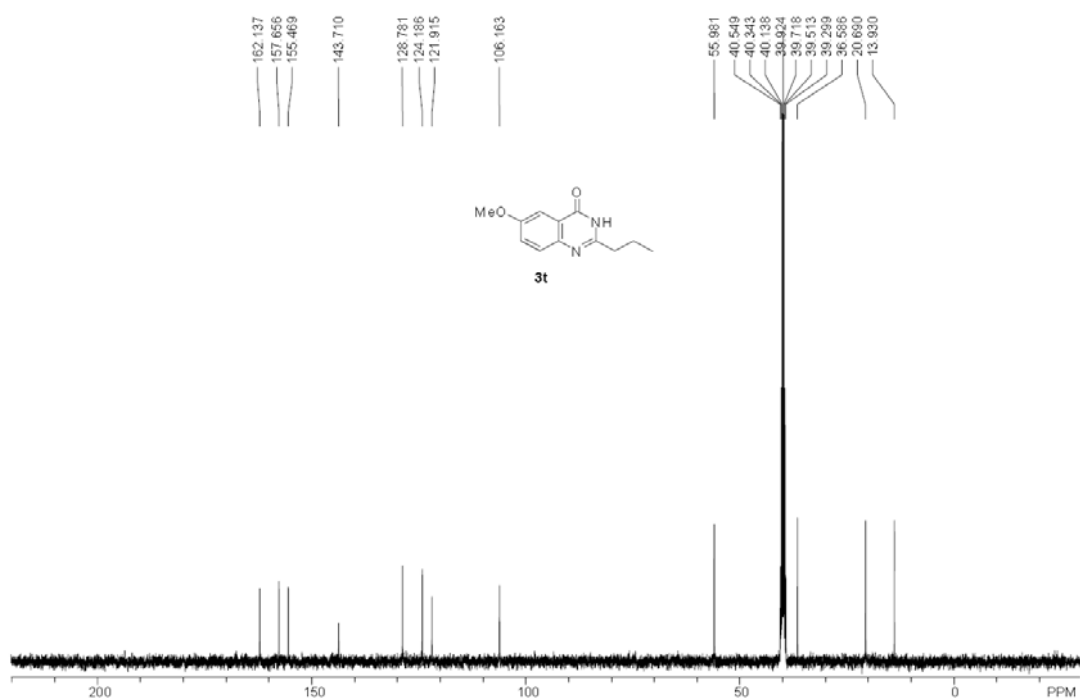

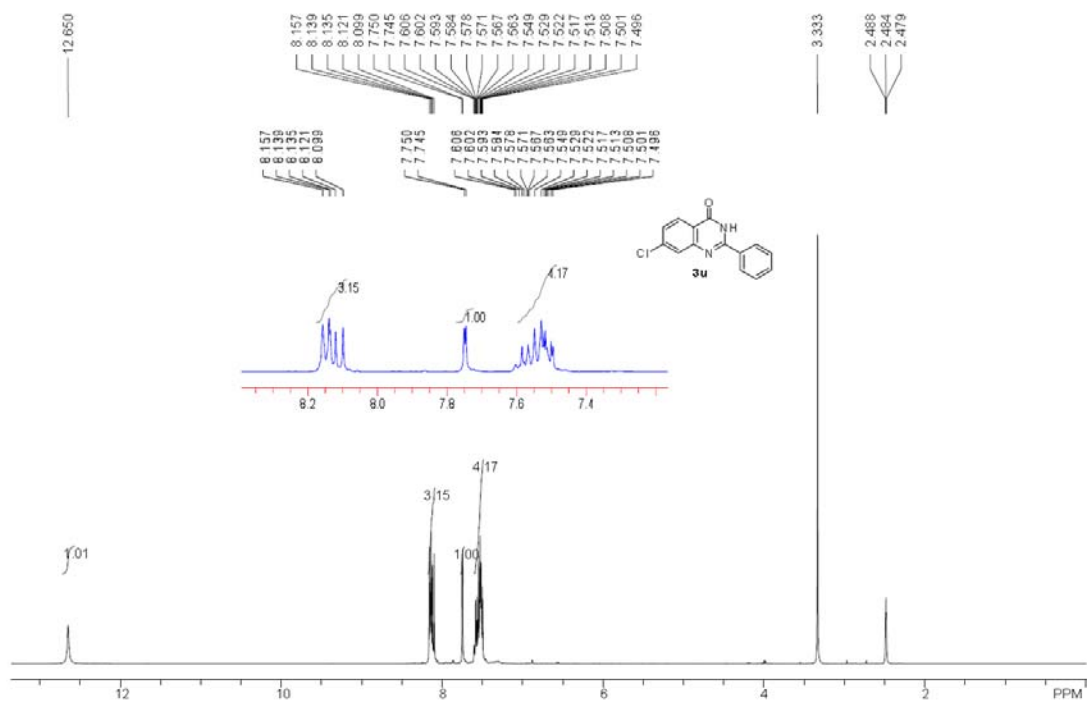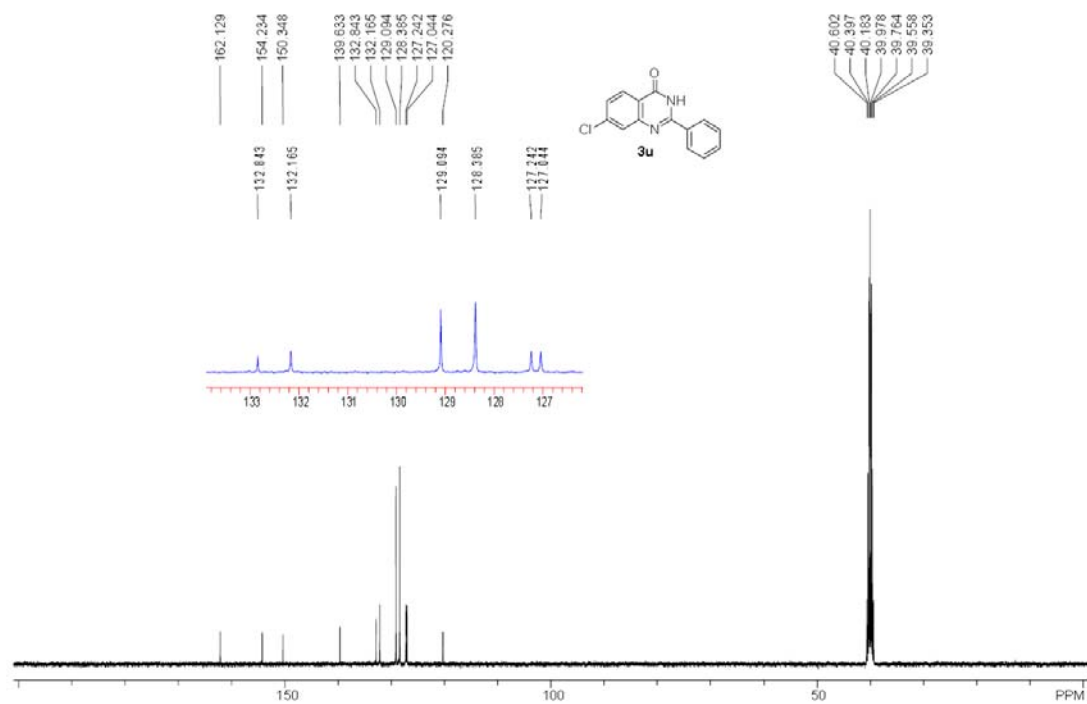

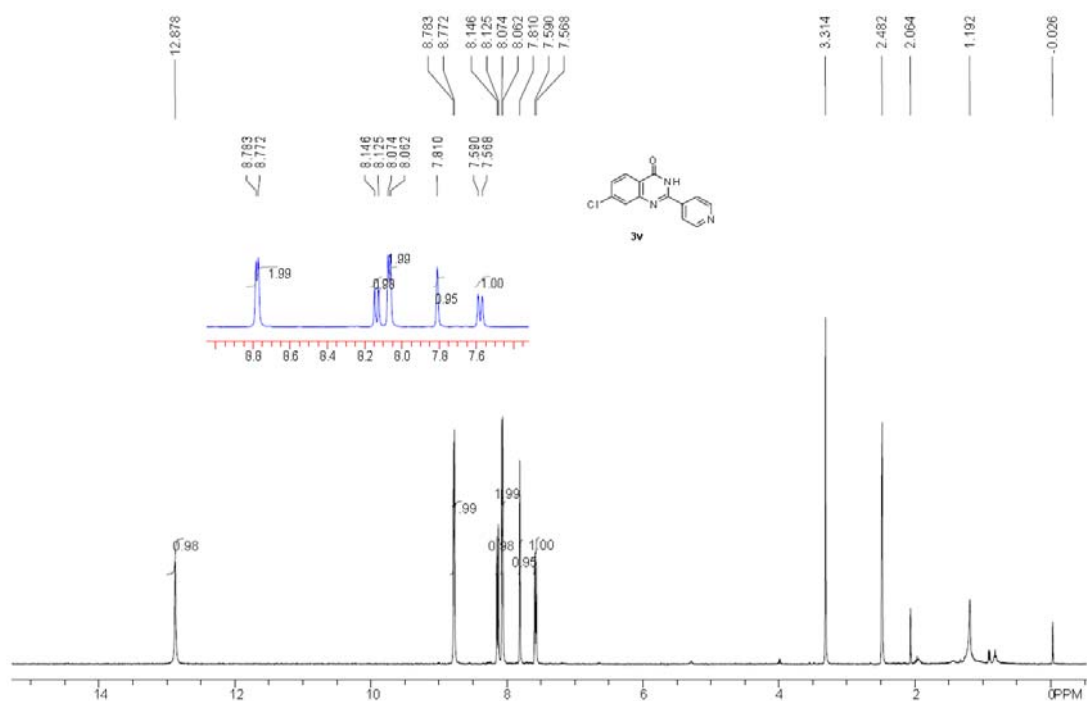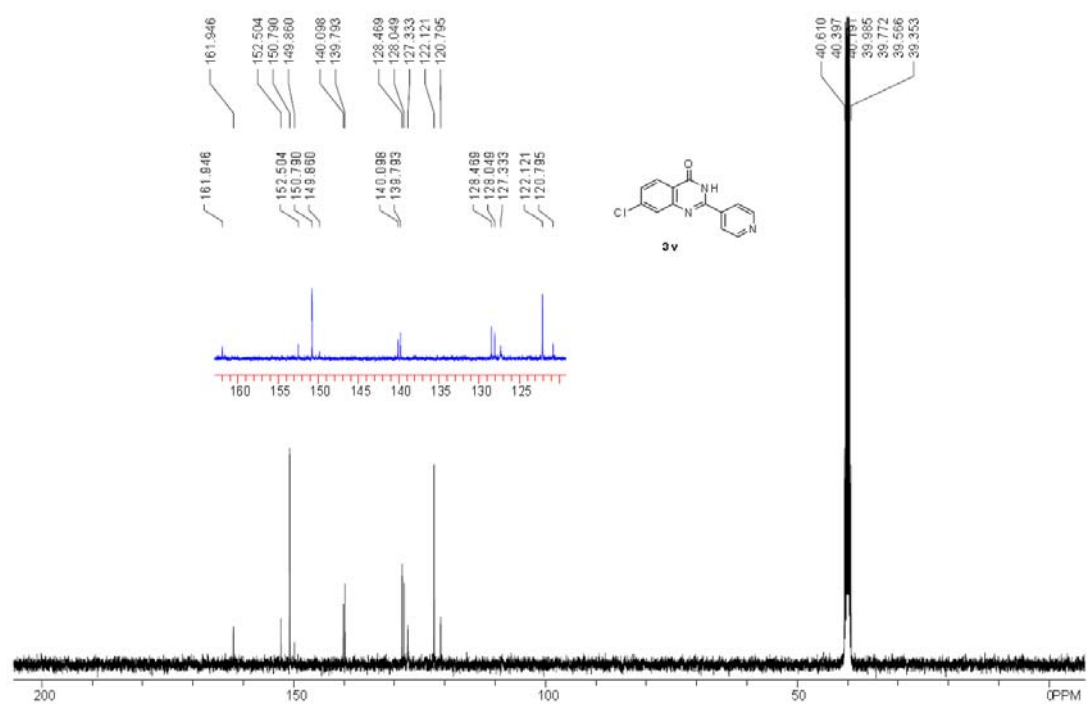

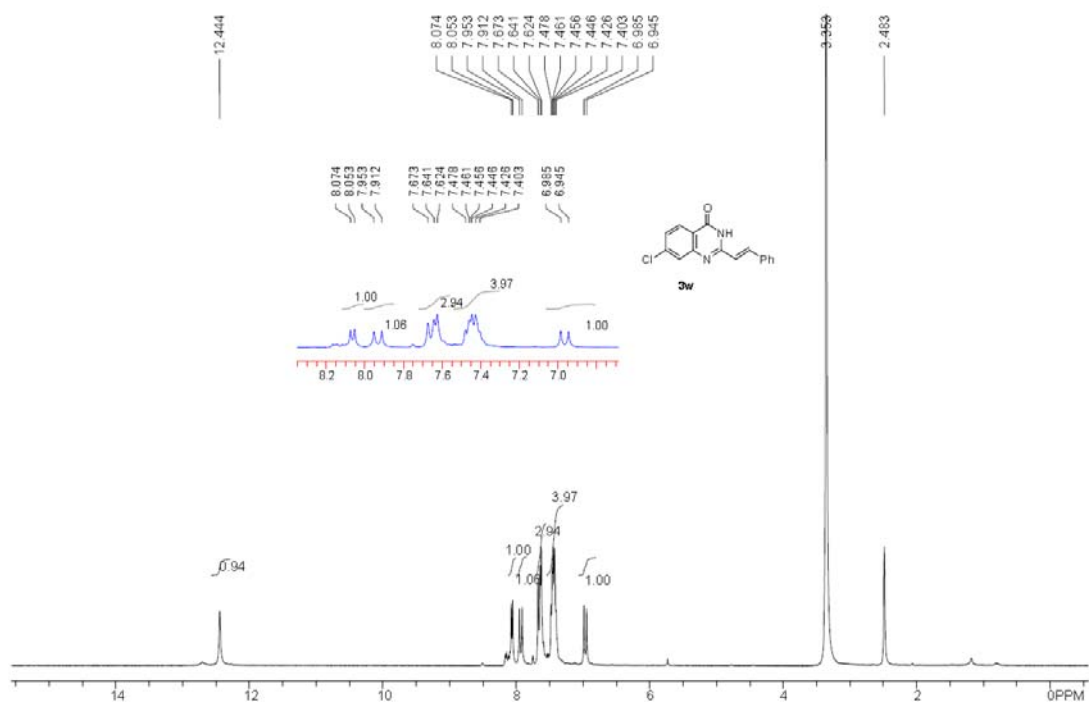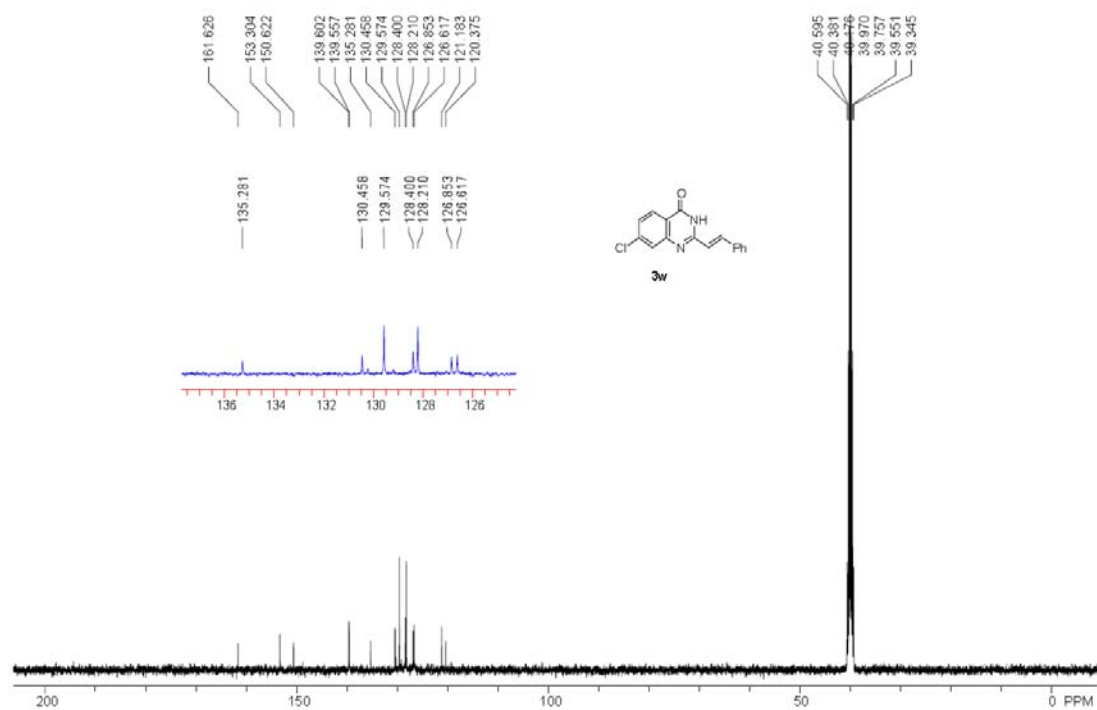



## II. Copies of $^1\text{H}$ and $^{13}\text{C}$ NMR spectra of 5a-5l

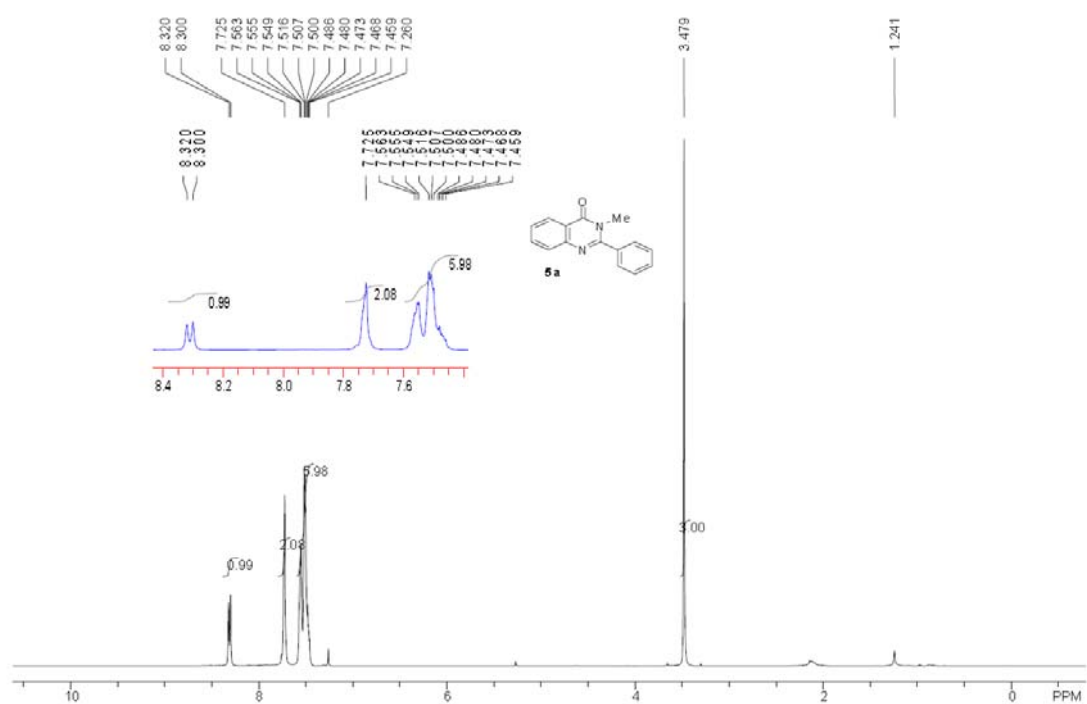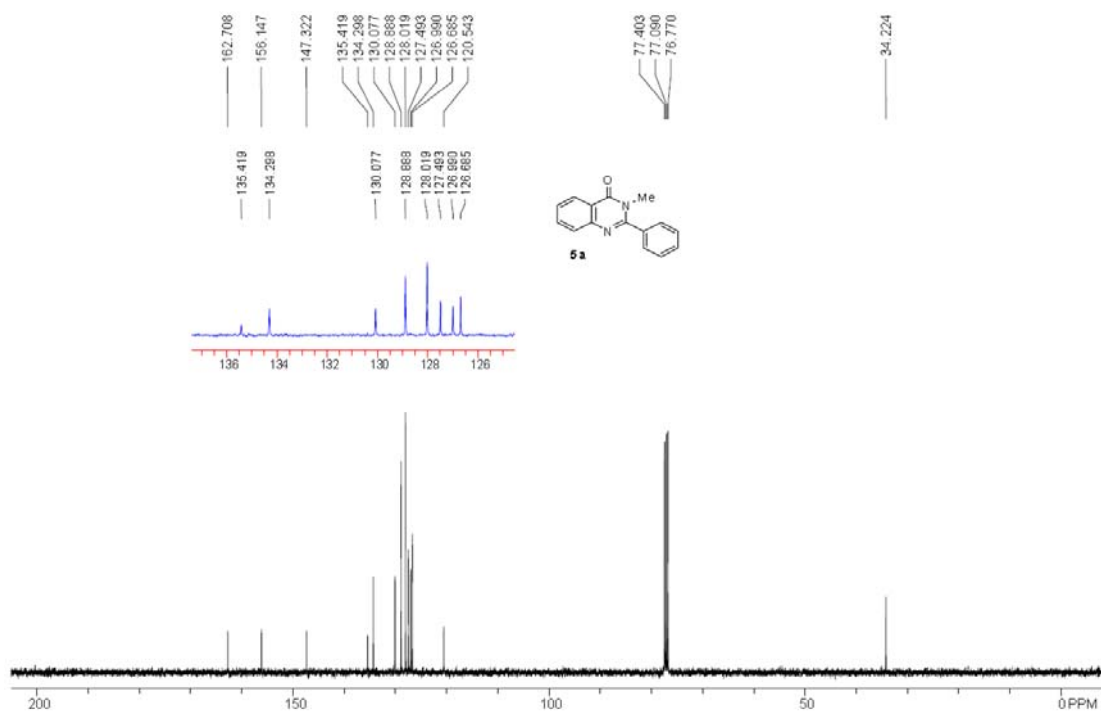

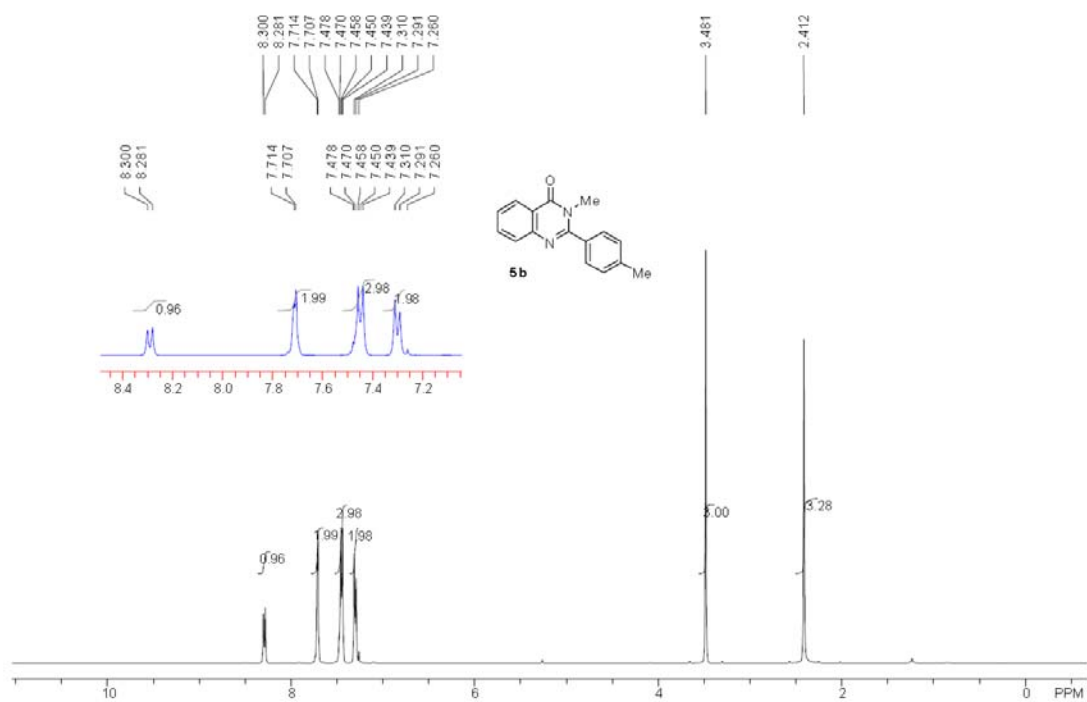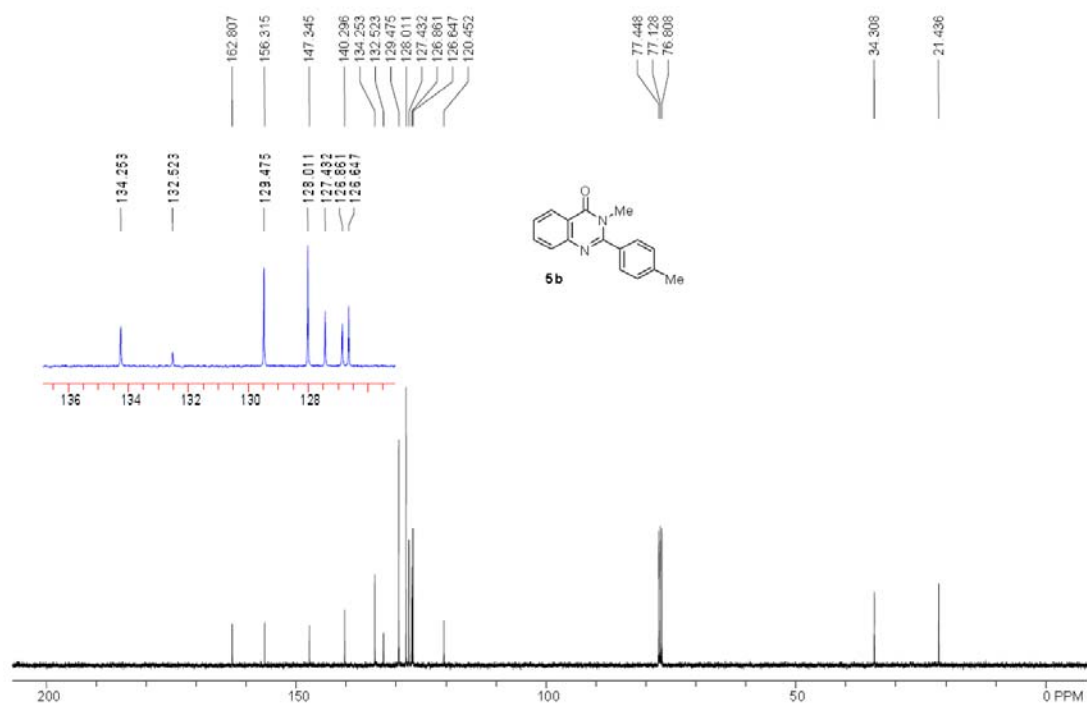

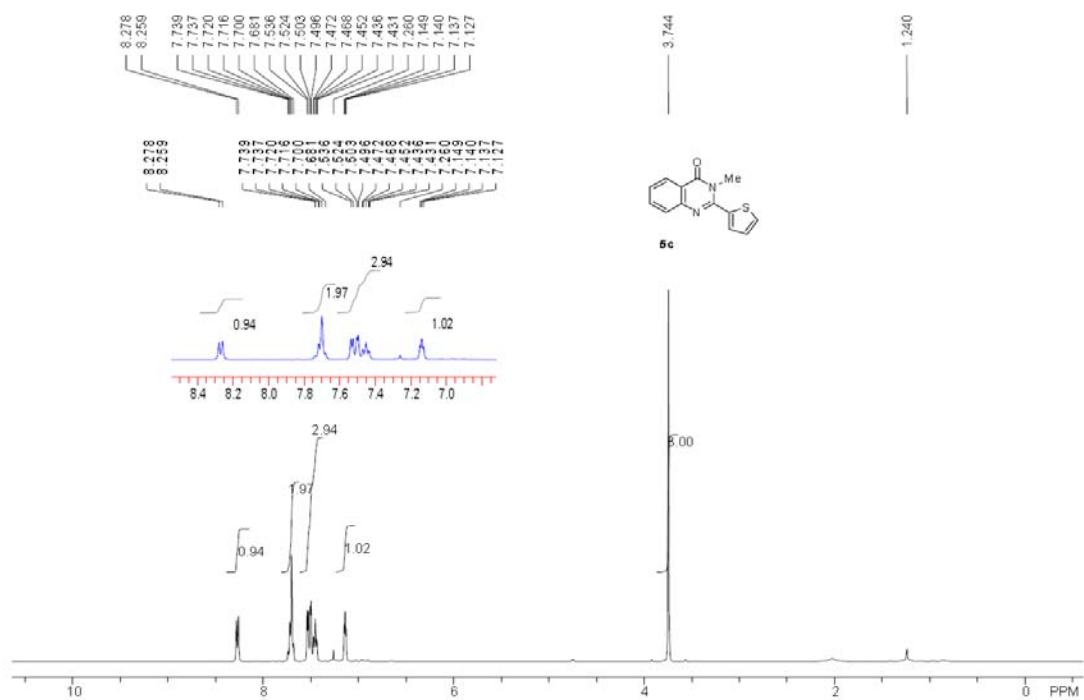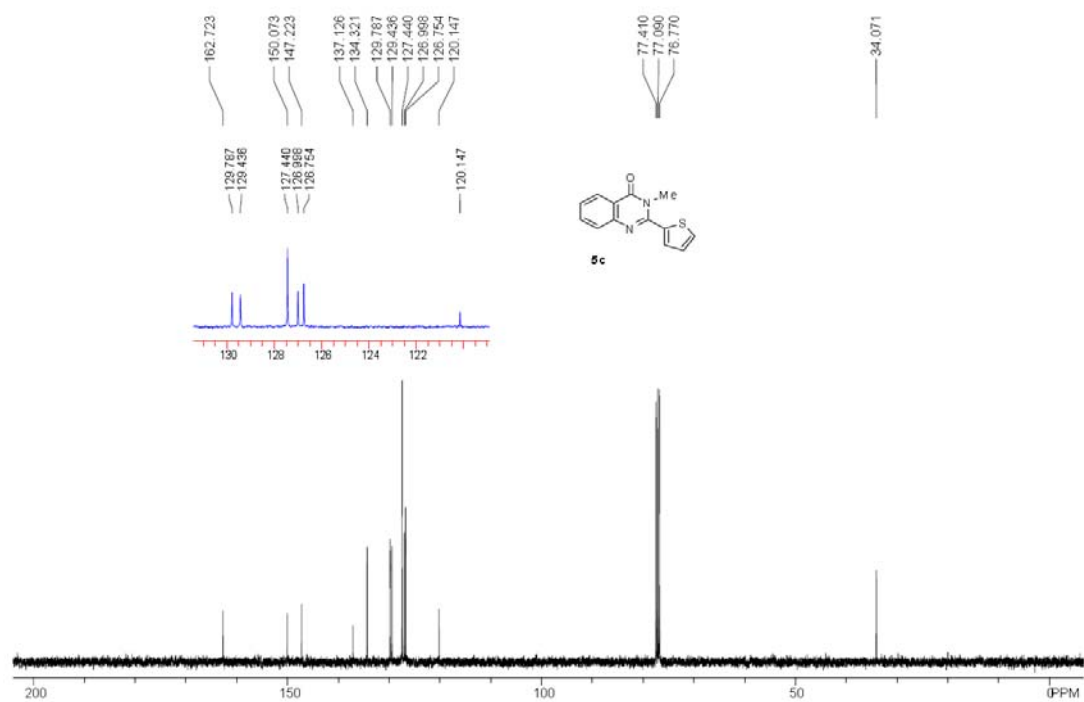

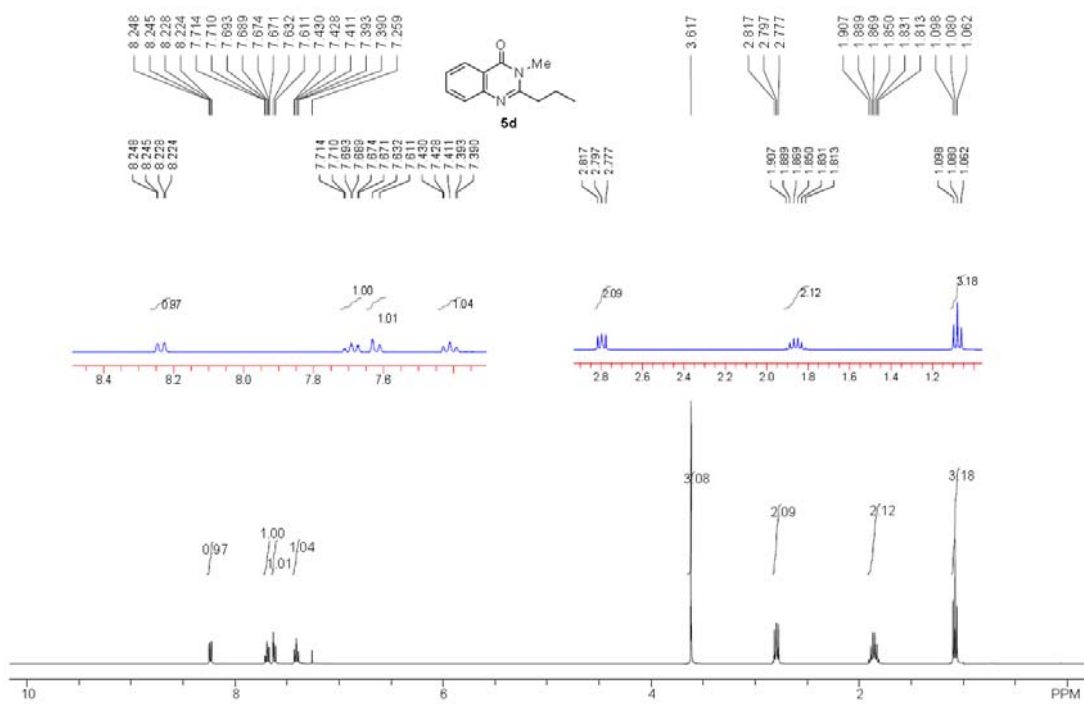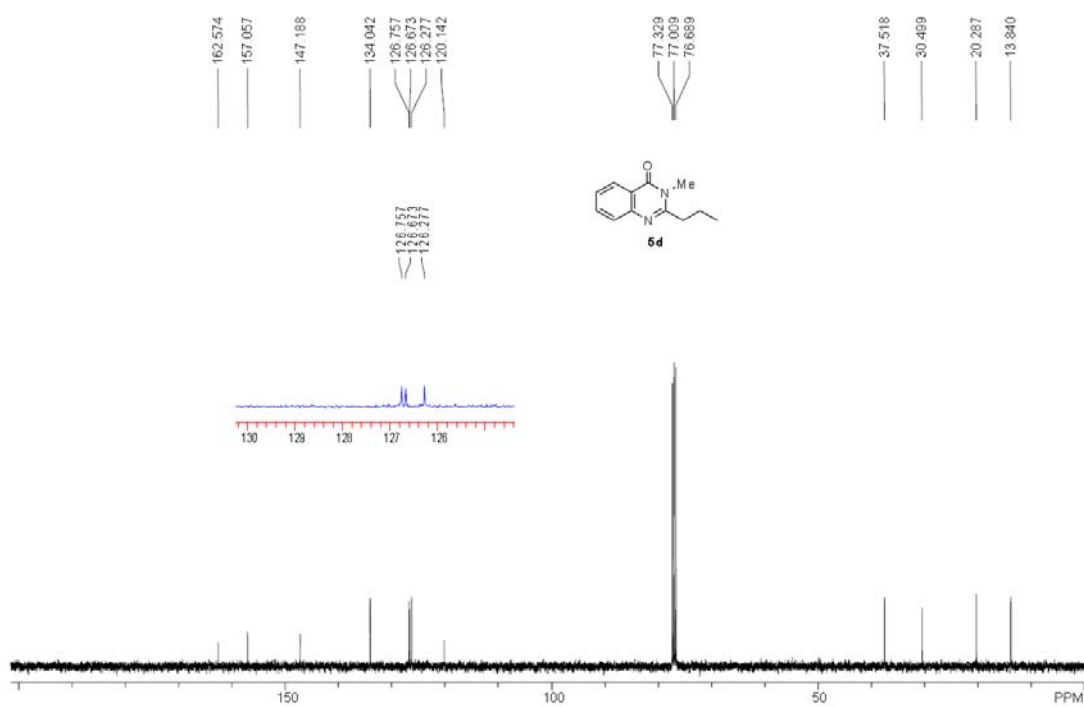

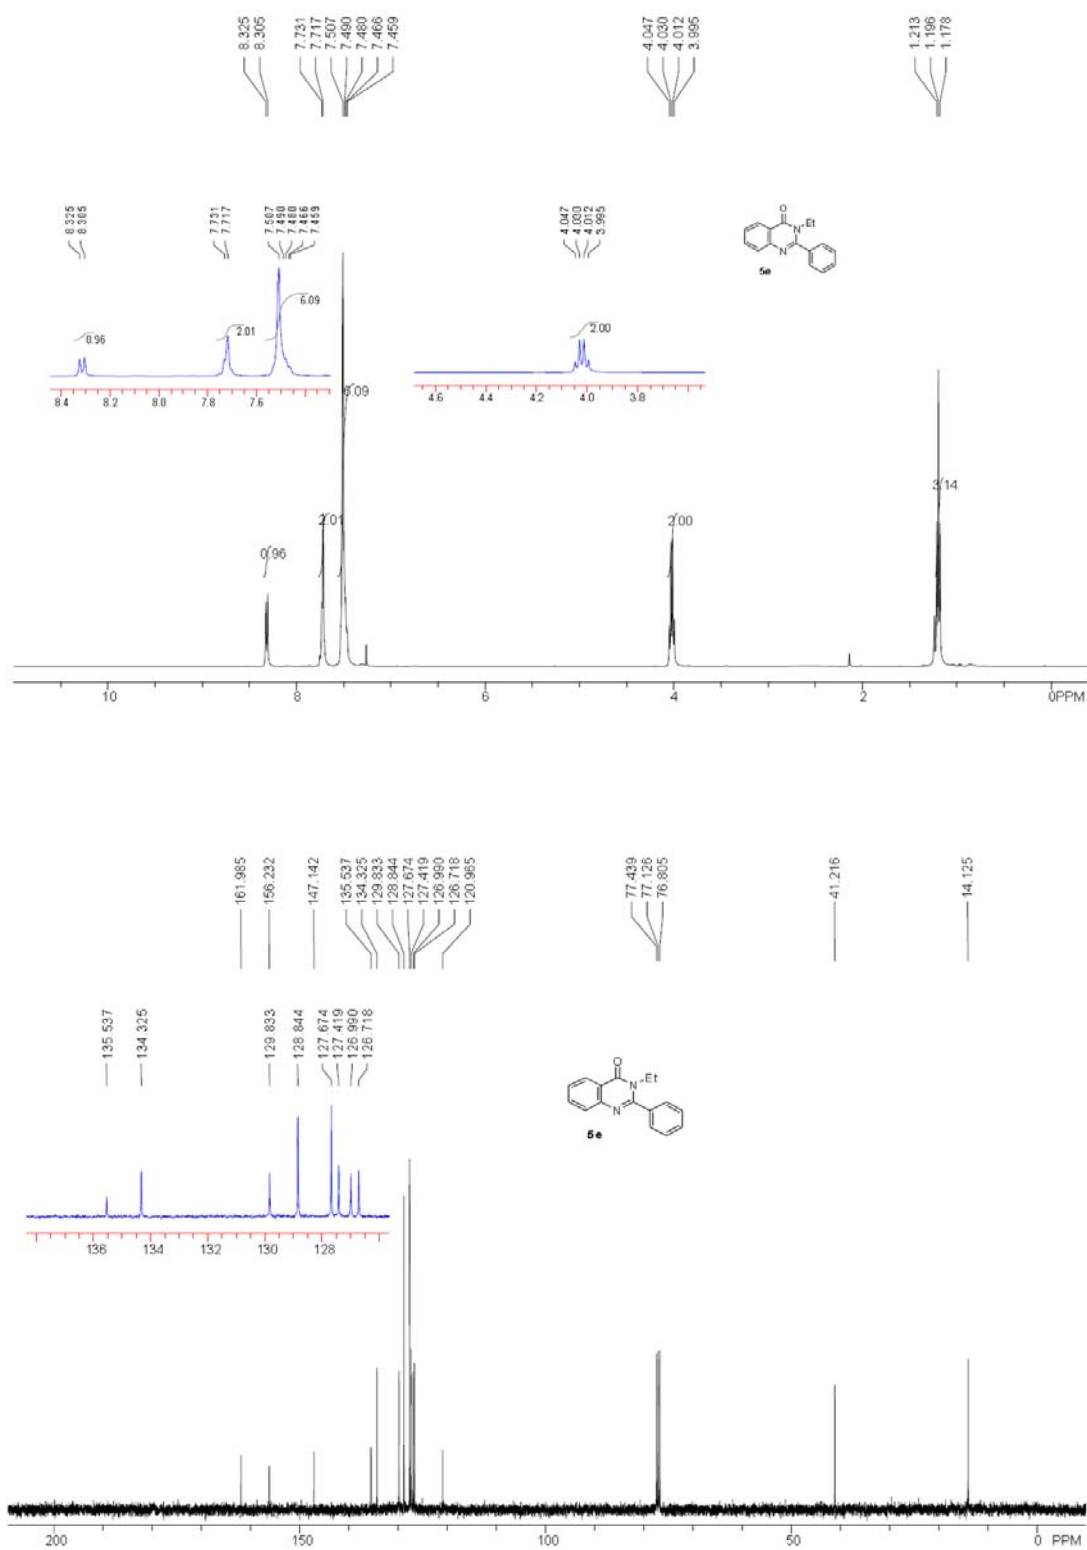

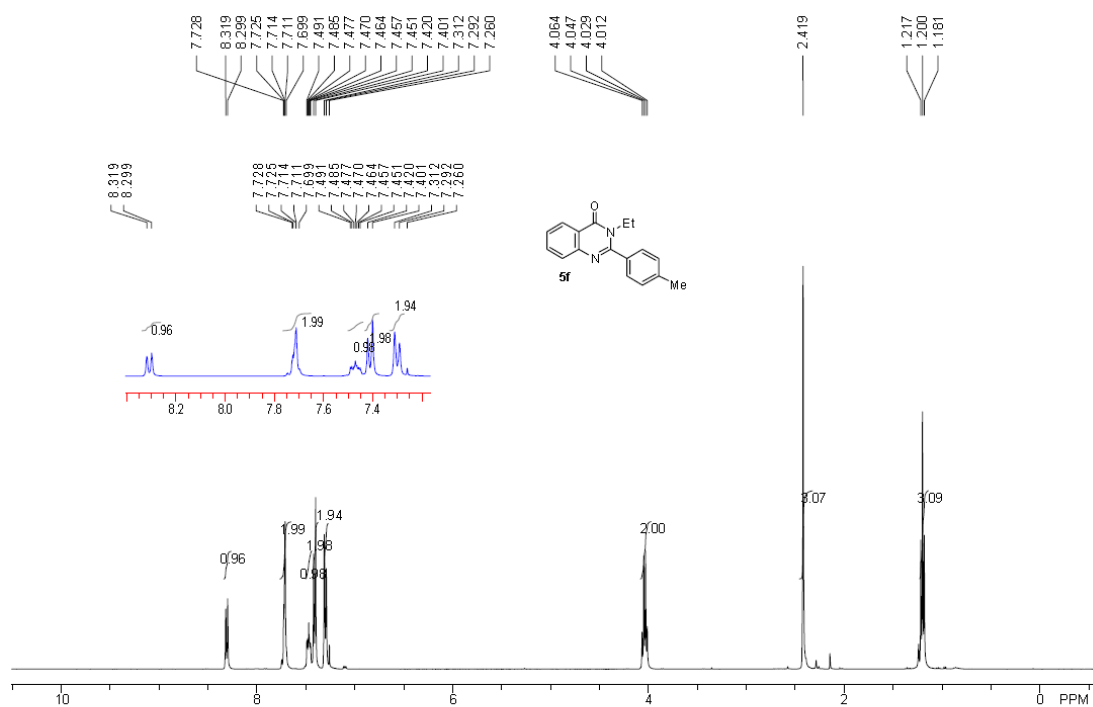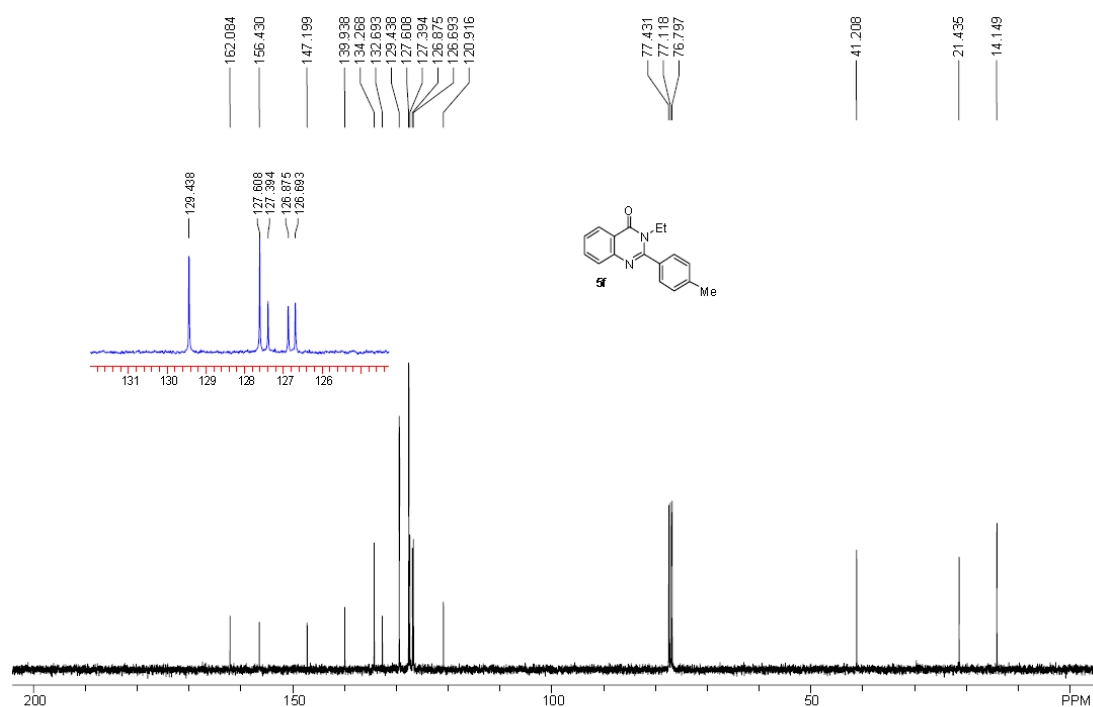

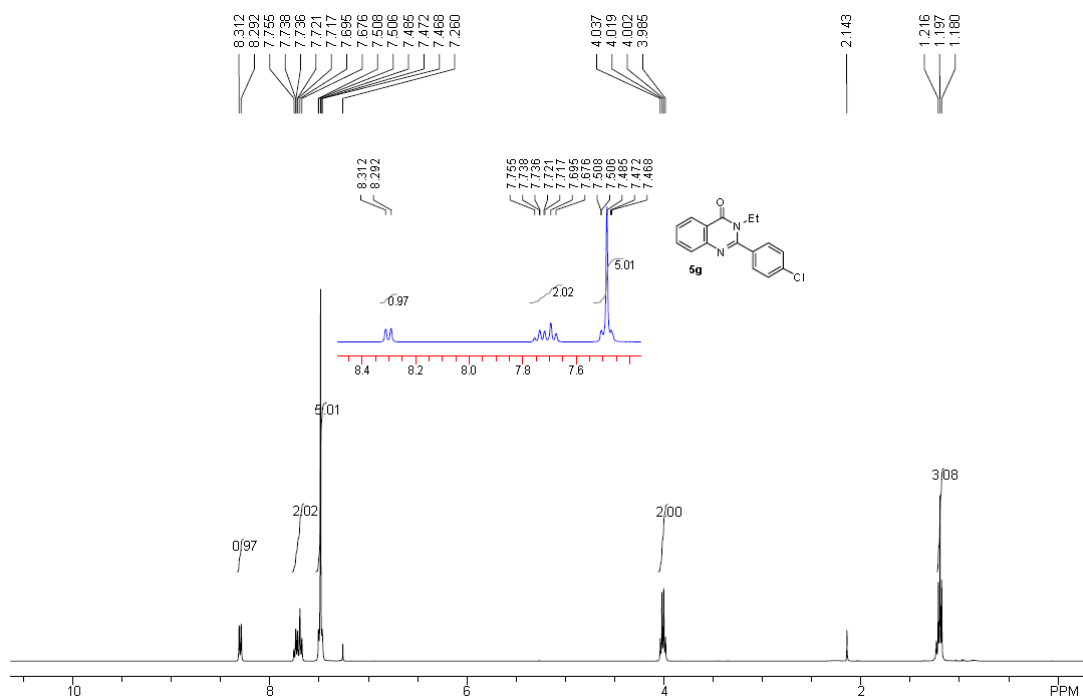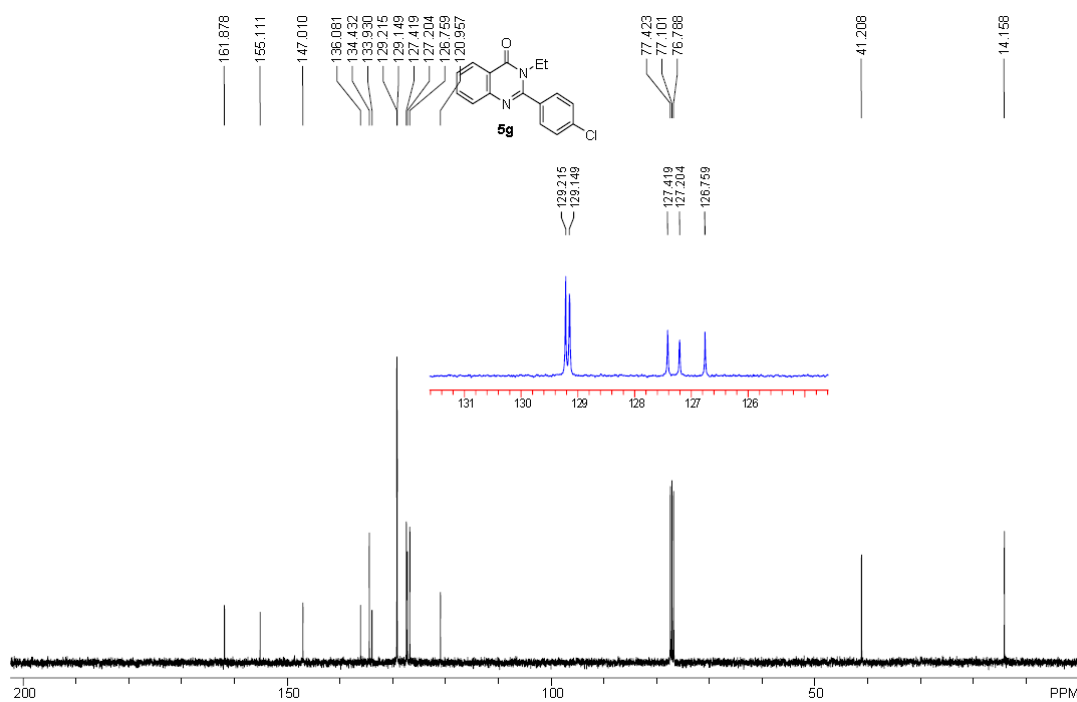

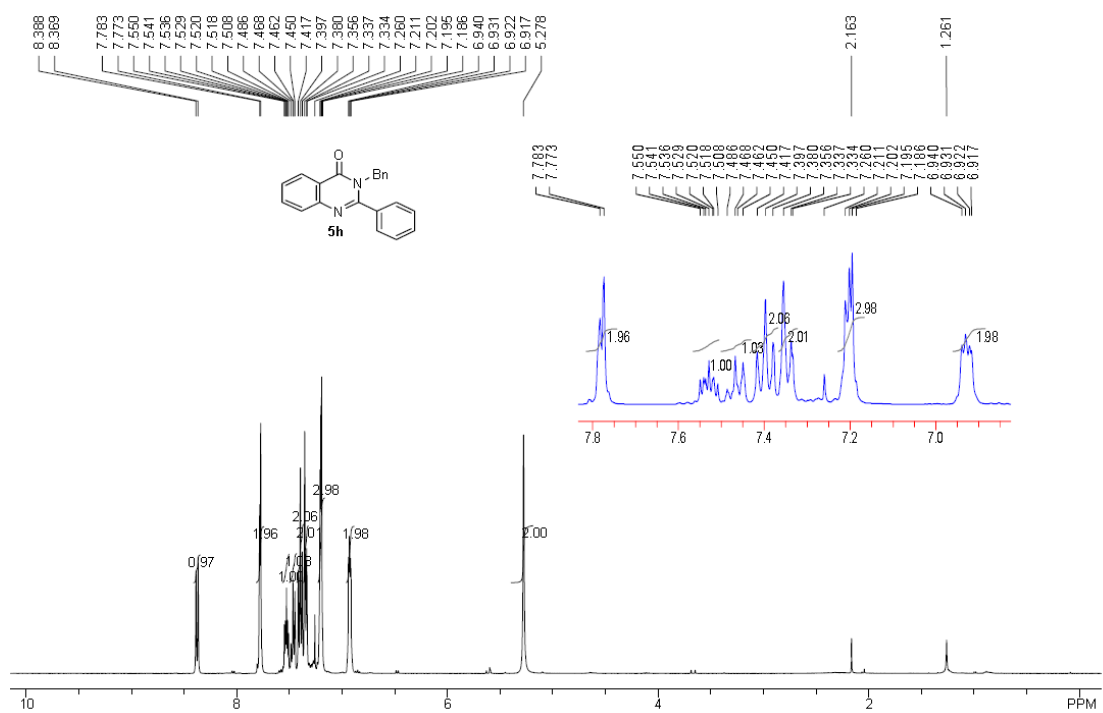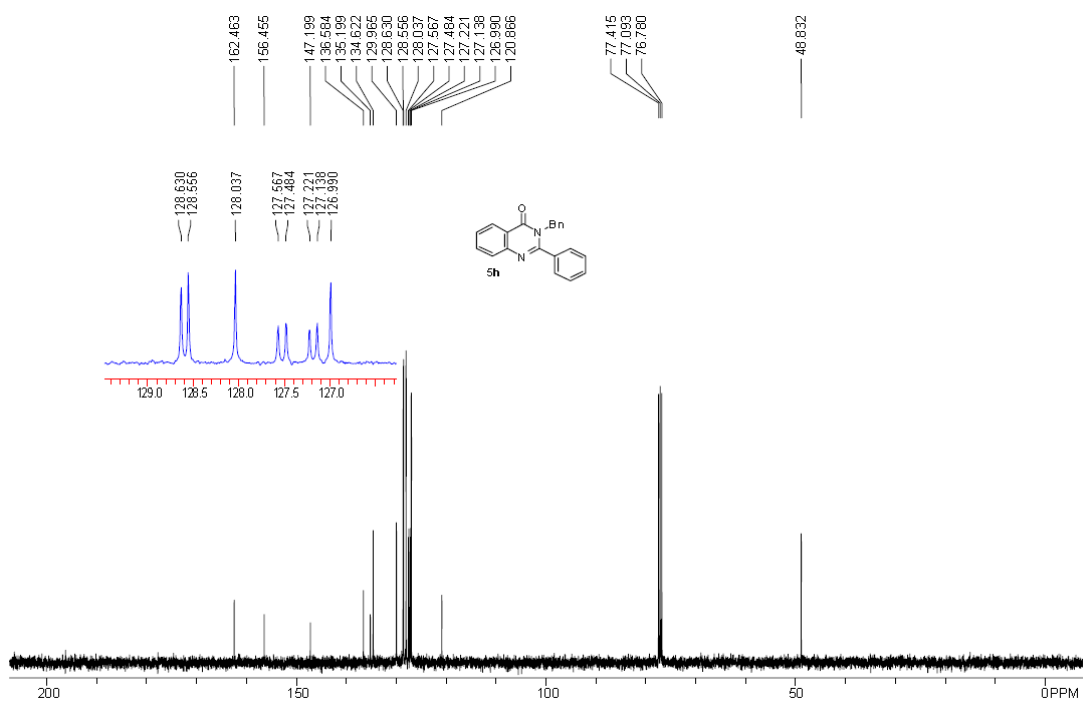



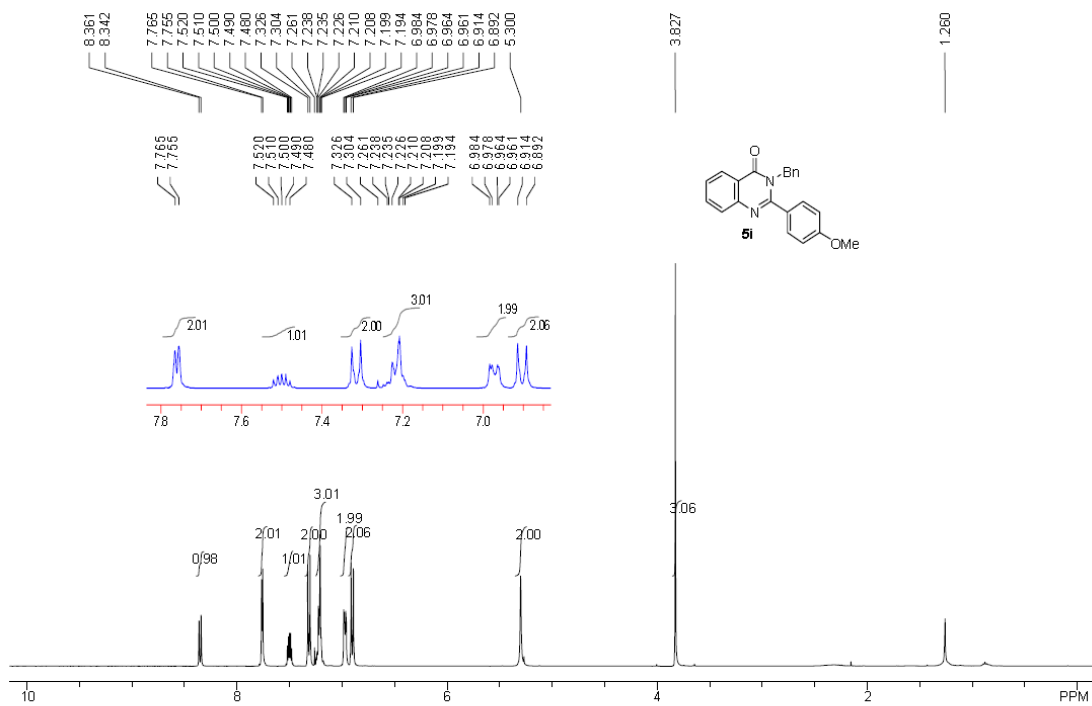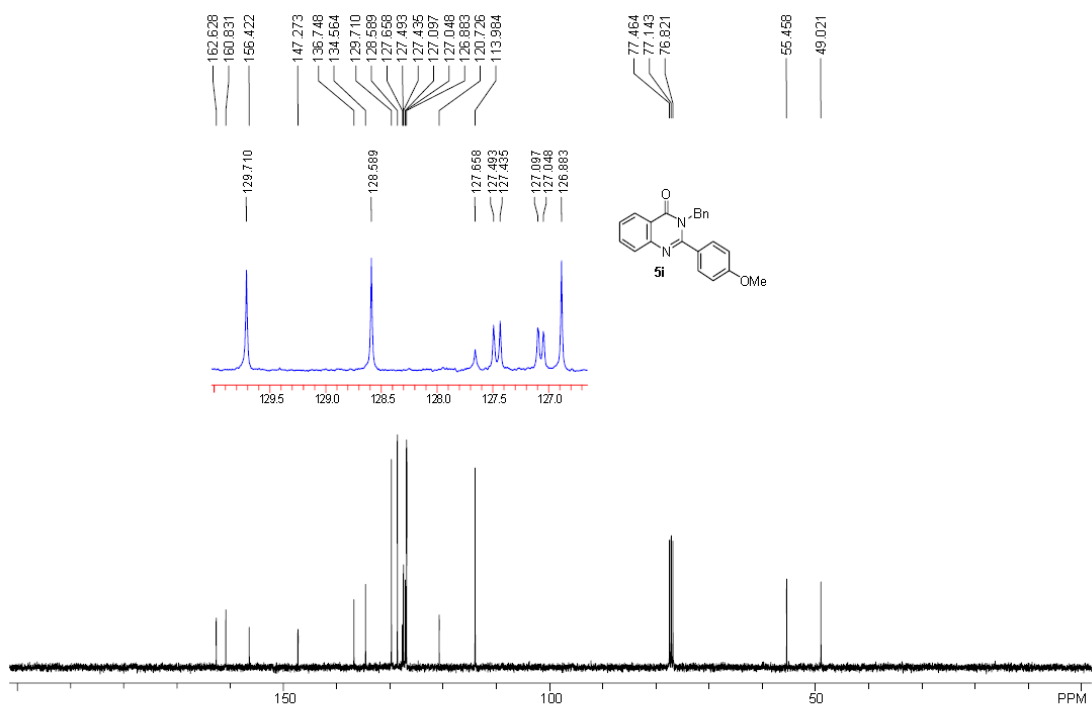

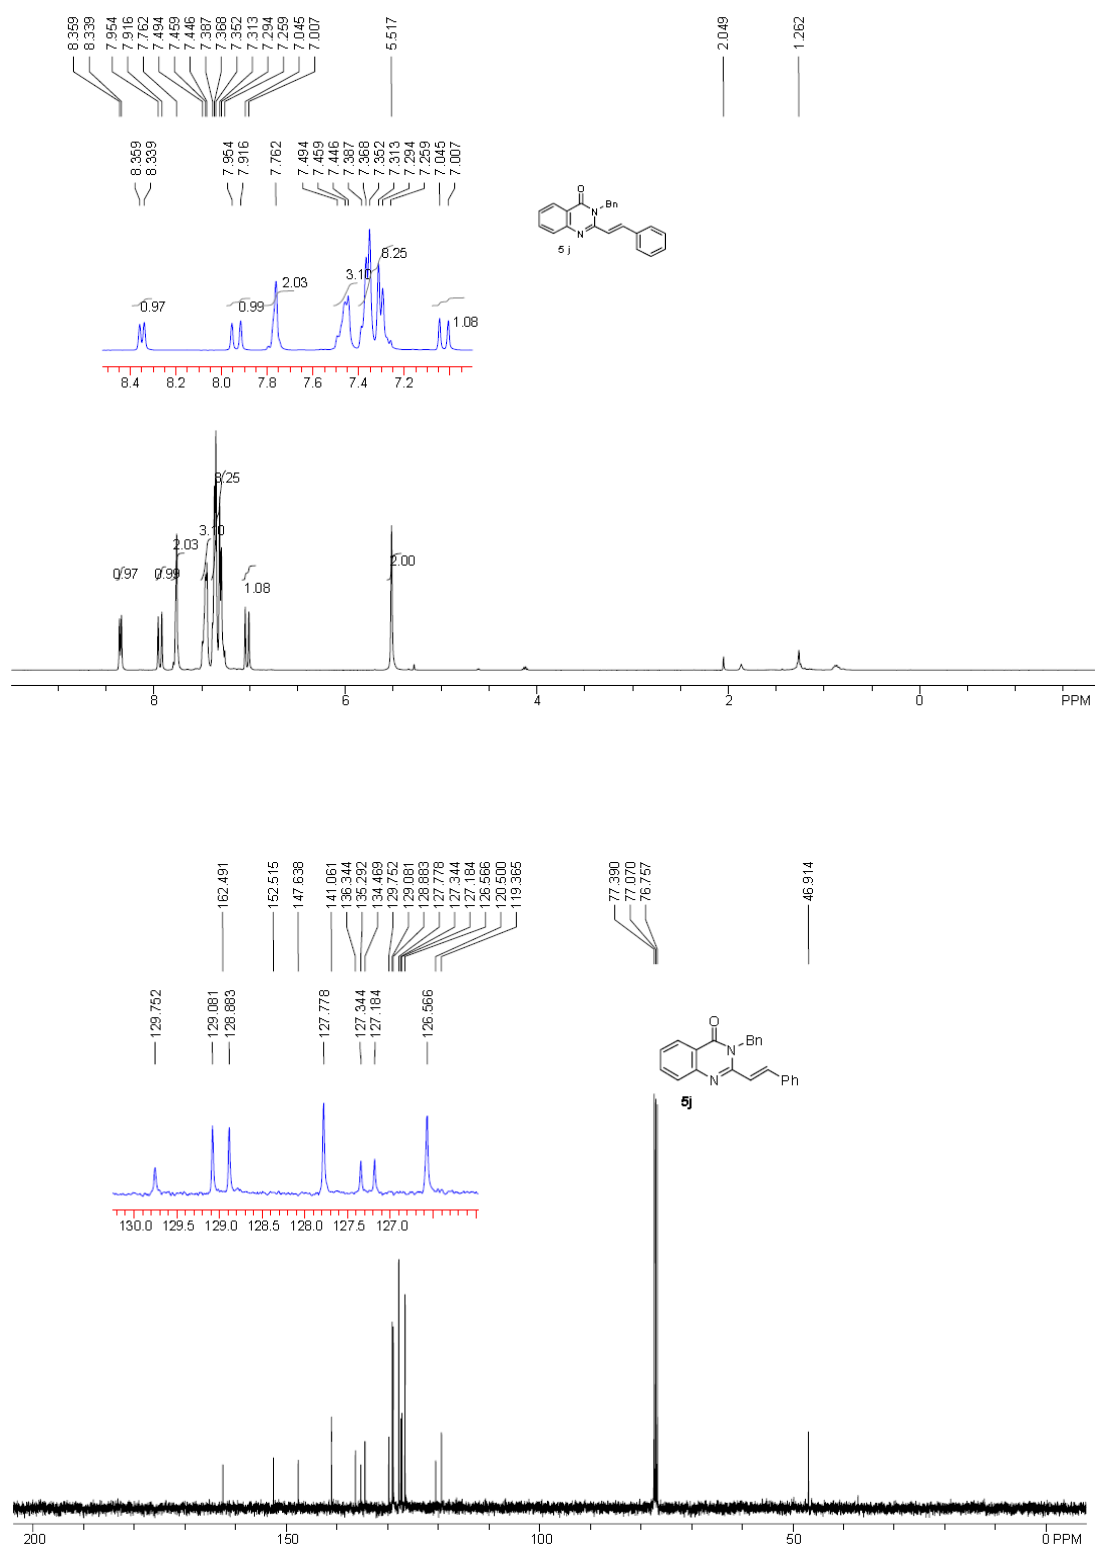

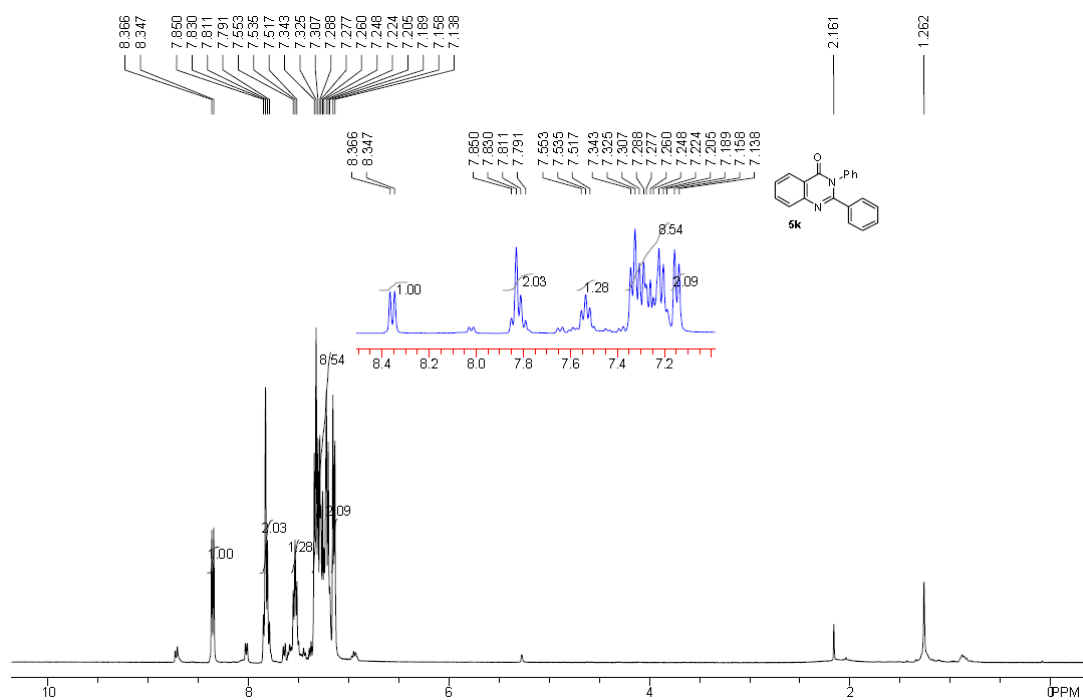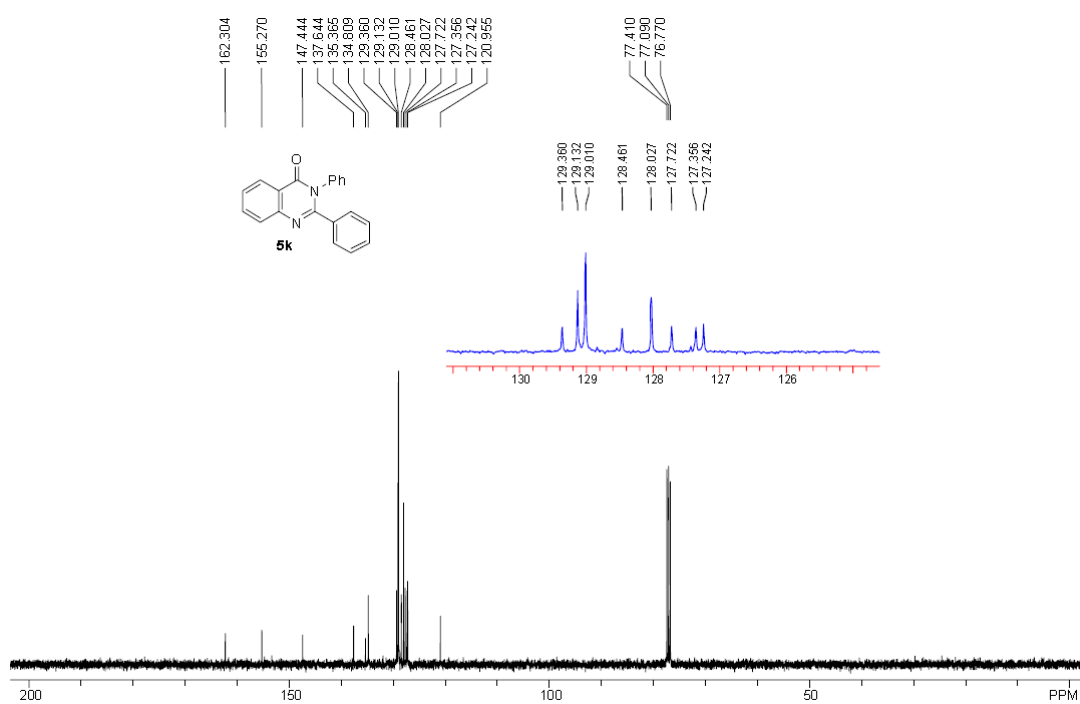

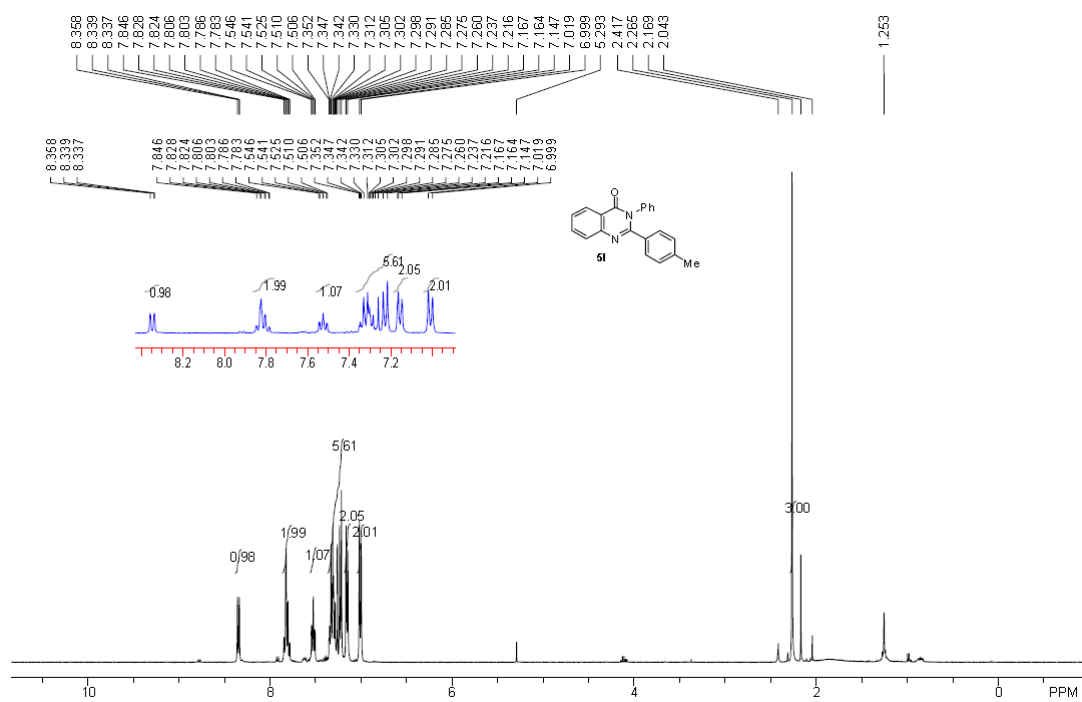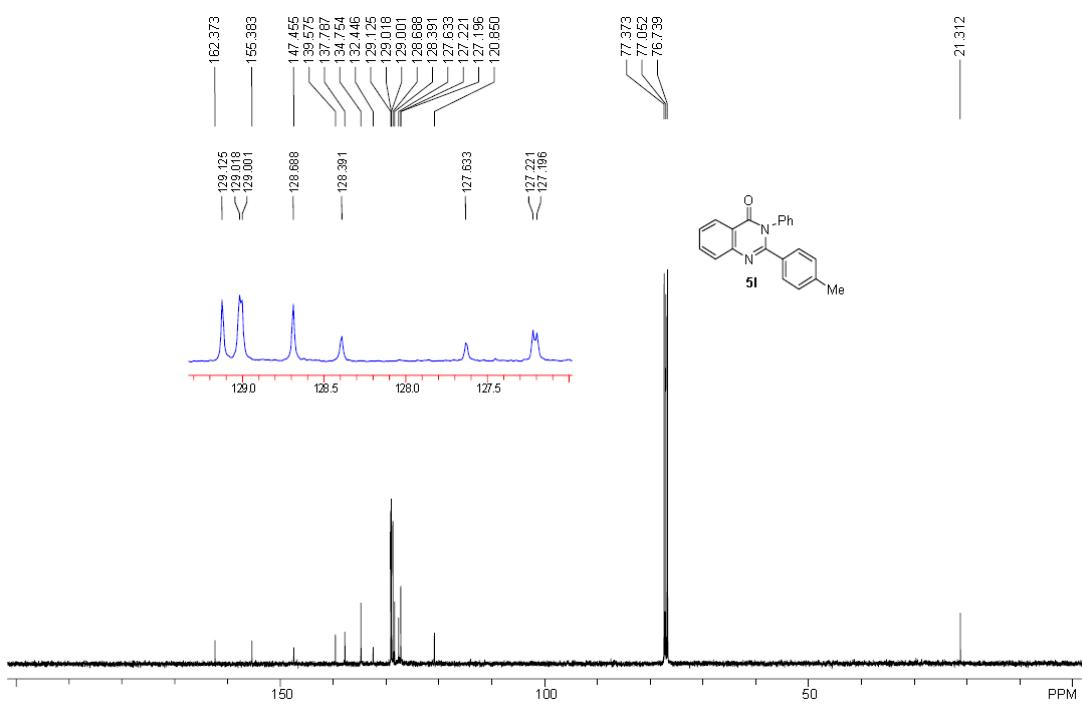

### III. Copies of $^1\text{H}$ and $^{13}\text{C}$ NMR spectra of 6 and 7

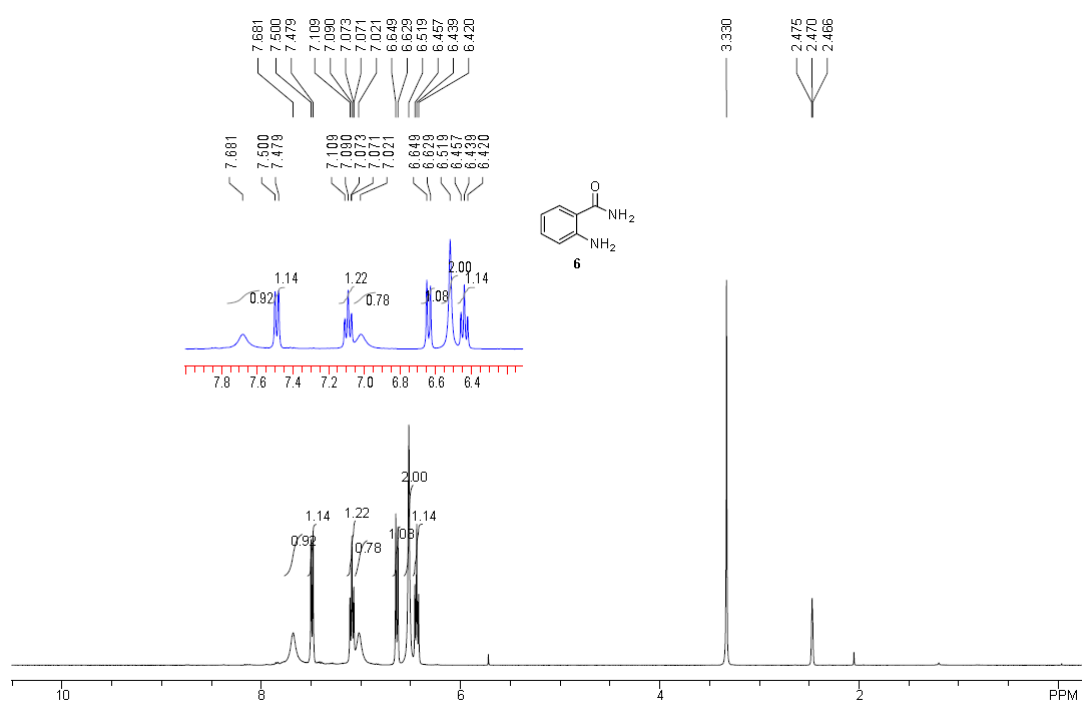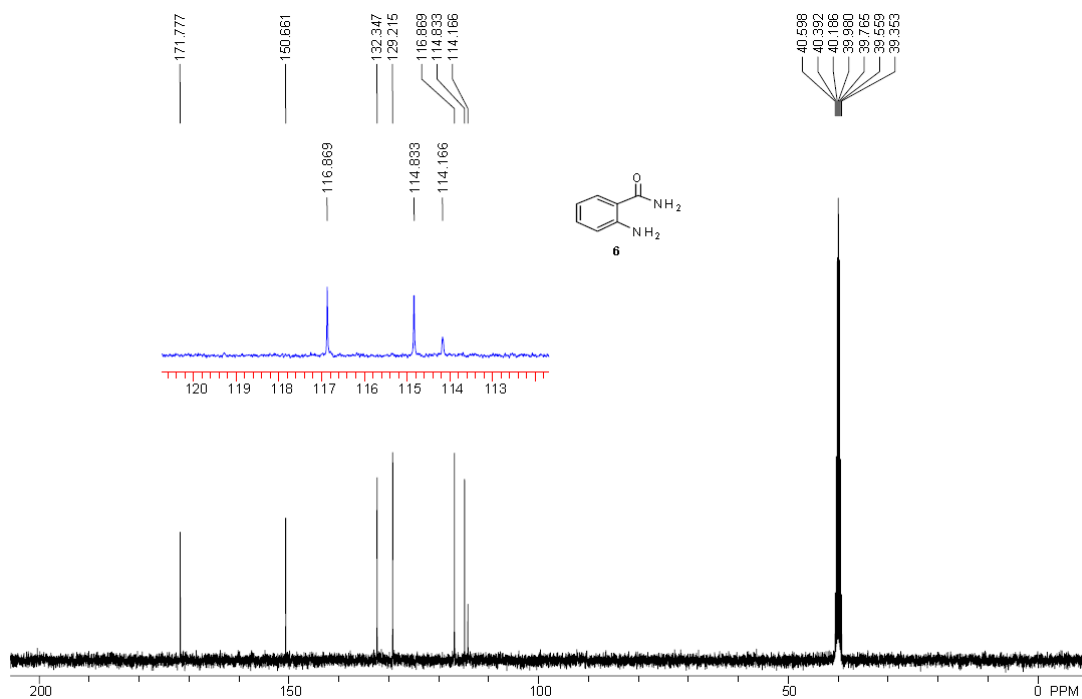

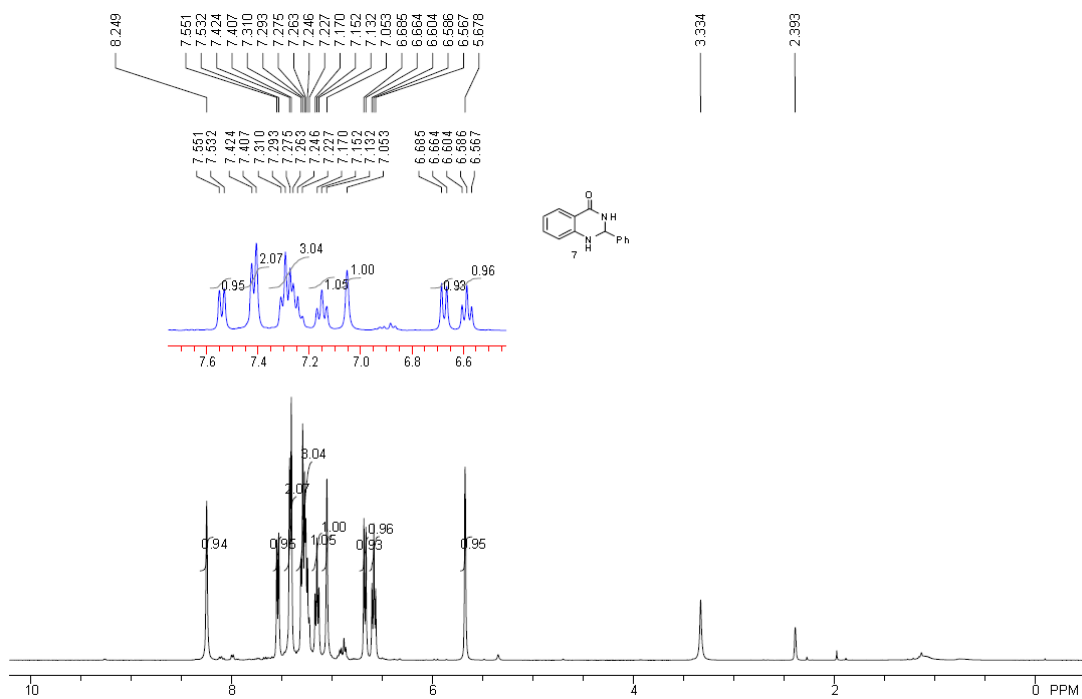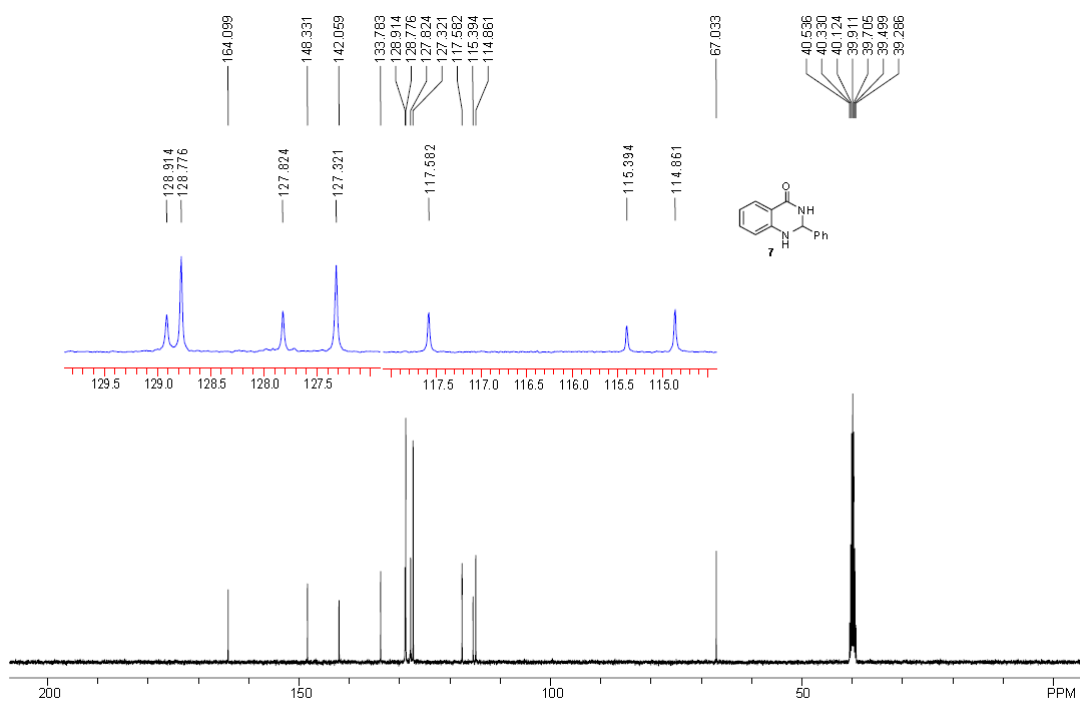

#### IV. Copies of $^1\text{H}$ and $^{13}\text{C}$ NMR spectra of 9

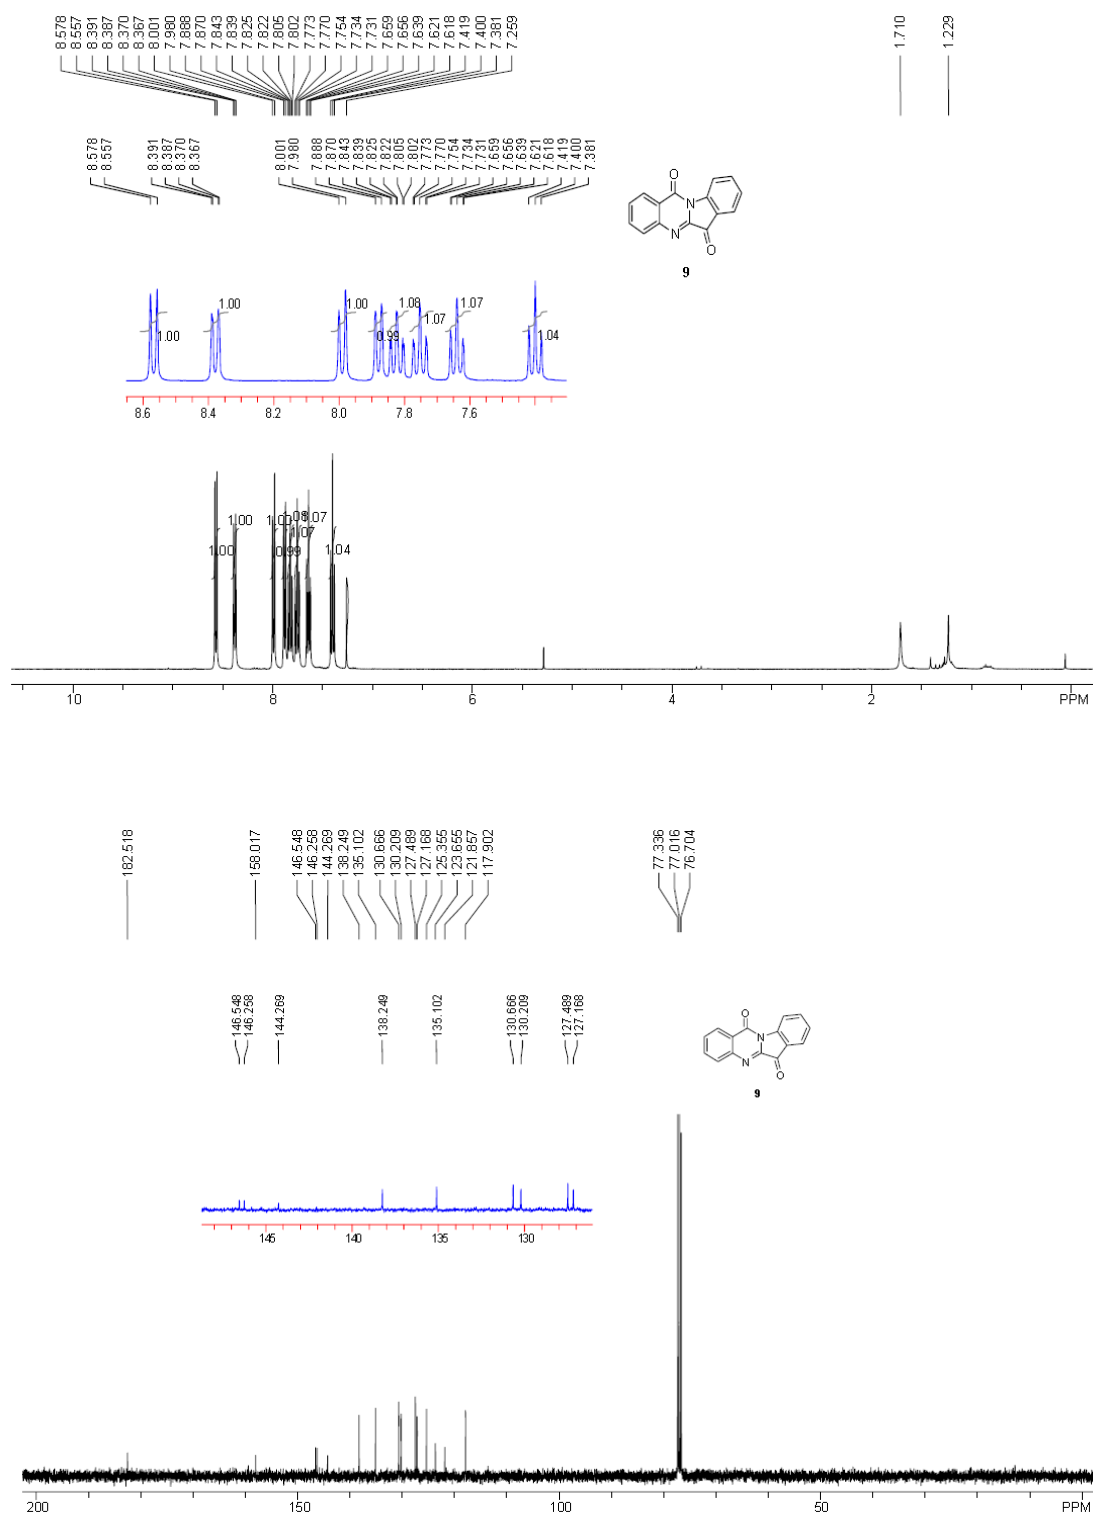

Supplement: c4ra10799c1.pdf [file c4ra10799c1.pdf]
